# Supplementary material
Source: ML conference proceedings conference paper supplement (https://proceedings.neurips.cc/paper_files/paper/2022/hash/7da6005a8d6942e8b328357da2872aed-Abstract.html)
Supplement: Supplementary file 1 [file 7da6005a8d6942e8b328357da2872aed-Supplemental-Conference.zip]

Archive with 468 entries (441 files):
- Appendix.pdf
- __MACOSX/._Appendix.pdf
- codes/
- __MACOSX/._codes
- codes/LICENSE
- __MACOSX/codes/._LICENSE
- codes/__init__.py
- __MACOSX/codes/.___init__.py
- codes/modular-rl/
- __MACOSX/codes/._modular-rl
- codes/README.md
- __MACOSX/codes/._README.md
- codes/modular-rl/.DS_Store
- __MACOSX/codes/modular-rl/._.DS_Store
- codes/modular-rl/requirements.txt
- __MACOSX/codes/modular-rl/._requirements.txt
- codes/modular-rl/__init__.py
- __MACOSX/codes/modular-rl/.___init__.py
- codes/modular-rl/.gitignore
- __MACOSX/codes/modular-rl/._.gitignore
- codes/modular-rl/src/
- __MACOSX/codes/modular-rl/._src
- codes/modular-rl/src/misc/
- __MACOSX/codes/modular-rl/src/._misc
- codes/modular-rl/src/.DS_Store
- __MACOSX/codes/modular-rl/src/._.DS_Store
- codes/modular-rl/src/config.py
- __MACOSX/codes/modular-rl/src/._config.py
- codes/modular-rl/src/checkpoint.py
- __MACOSX/codes/modular-rl/src/._checkpoint.py
- codes/modular-rl/src/arguments.py
- __MACOSX/codes/modular-rl/src/._arguments.py
- codes/modular-rl/src/environments/
- __MACOSX/codes/modular-rl/src/._environments
- codes/modular-rl/src/__init__.py
- __MACOSX/codes/modular-rl/src/.___init__.py
- codes/modular-rl/src/algs/
- __MACOSX/codes/modular-rl/src/._algs
- codes/modular-rl/src/visualize.py
- __MACOSX/codes/modular-rl/src/._visualize.py
- codes/modular-rl/src/utils.py
- __MACOSX/codes/modular-rl/src/._utils.py
- codes/modular-rl/src/wrappers.py
- __MACOSX/codes/modular-rl/src/._wrappers.py
- codes/modular-rl/src/main.py
- __MACOSX/codes/modular-rl/src/._main.py
- codes/modular-rl/src/vec_env/
- __MACOSX/codes/modular-rl/src/._vec_env
- codes/modular-rl/src/misc/skybox.xml
- __MACOSX/codes/modular-rl/src/misc/._skybox.xml
- codes/modular-rl/src/misc/sans-serif.ttf
- __MACOSX/codes/modular-rl/src/misc/._sans-serif.ttf
- codes/modular-rl/src/misc/skybox_white.xml
- __MACOSX/codes/modular-rl/src/misc/._skybox_white.xml
- codes/modular-rl/src/misc/visual_white.xml
- __MACOSX/codes/modular-rl/src/misc/._visual_white.xml
- codes/modular-rl/src/misc/visual_copy.xml
- __MACOSX/codes/modular-rl/src/misc/._visual_copy.xml
- codes/modular-rl/src/misc/visual.xml
- __MACOSX/codes/modular-rl/src/misc/._visual.xml
- codes/modular-rl/src/misc/materials.xml
- __MACOSX/codes/modular-rl/src/misc/._materials.xml
- codes/modular-rl/src/misc/materials_white.xml
- __MACOSX/codes/modular-rl/src/misc/._materials_white.xml
- codes/modular-rl/src/environments/humanoids/
- __MACOSX/codes/modular-rl/src/environments/._humanoids
- codes/modular-rl/src/environments/unimalA/
- __MACOSX/codes/modular-rl/src/environments/._unimalA
- codes/modular-rl/src/environments/.DS_Store
- __MACOSX/codes/modular-rl/src/environments/._.DS_Store
- codes/modular-rl/src/environments/walker_humanoids_hopper/
- __MACOSX/codes/modular-rl/src/environments/._walker_humanoids_hopper
- codes/modular-rl/src/environments/walker_3_main.py
- __MACOSX/codes/modular-rl/src/environments/._walker_3_main.py
- codes/modular-rl/src/environments/hopper_3.py
- __MACOSX/codes/modular-rl/src/environments/._hopper_3.py
- codes/modular-rl/src/environments/humanoid_2d_7_lower_arms.py
- __MACOSX/codes/modular-rl/src/environments/._humanoid_2d_7_lower_arms.py
- codes/modular-rl/src/environments/humanoid_2d_8_left_knee.py
- __MACOSX/codes/modular-rl/src/environments/._humanoid_2d_8_left_knee.py
- codes/modular-rl/src/environments/humanoid_2d_8_right_knee.py
- __MACOSX/codes/modular-rl/src/environments/._humanoid_2d_8_right_knee.py
- codes/modular-rl/src/environments/__init__.py
- __MACOSX/codes/modular-rl/src/environments/.___init__.py
- codes/modular-rl/src/environments/xmls/
- __MACOSX/codes/modular-rl/src/environments/._xmls
- codes/modular-rl/src/environments/hoppers/
- __MACOSX/codes/modular-rl/src/environments/._hoppers
- codes/modular-rl/src/environments/walker_2_main.py
- __MACOSX/codes/modular-rl/src/environments/._walker_2_main.py
- codes/modular-rl/src/environments/unimalC/
- __MACOSX/codes/modular-rl/src/environments/._unimalC
- codes/modular-rl/src/environments/walker_7_main.py
- __MACOSX/codes/modular-rl/src/environments/._walker_7_main.py
- codes/modular-rl/src/environments/humanoid_2d_7_right_leg.py
- __MACOSX/codes/modular-rl/src/environments/._humanoid_2d_7_right_leg.py
- codes/modular-rl/src/environments/unimal/
- __MACOSX/codes/modular-rl/src/environments/._unimal
- codes/modular-rl/src/environments/hopper_5.py
- __MACOSX/codes/modular-rl/src/environments/._hopper_5.py
- codes/modular-rl/src/environments/unimalB/
- __MACOSX/codes/modular-rl/src/environments/._unimalB
- codes/modular-rl/src/environments/walkers/
- __MACOSX/codes/modular-rl/src/environments/._walkers
- codes/modular-rl/src/environments/humanoid_2d_7_left_arm.py
- __MACOSX/codes/modular-rl/src/environments/._humanoid_2d_7_left_arm.py
- codes/modular-rl/src/environments/walker_6_main.py
- __MACOSX/codes/modular-rl/src/environments/._walker_6_main.py
- codes/modular-rl/src/environments/humanoid_2d_9_full.py
- __MACOSX/codes/modular-rl/src/environments/._humanoid_2d_9_full.py
- codes/modular-rl/src/environments/hopper_4.py
- __MACOSX/codes/modular-rl/src/environments/._hopper_4.py
- codes/modular-rl/src/environments/humanoid_2d_7_left_leg.py
- __MACOSX/codes/modular-rl/src/environments/._humanoid_2d_7_left_leg.py
- codes/modular-rl/src/environments/walker_4_main.py
- __MACOSX/codes/modular-rl/src/environments/._walker_4_main.py
- codes/modular-rl/src/environments/walker_5_main.py
- __MACOSX/codes/modular-rl/src/environments/._walker_5_main.py
- codes/modular-rl/src/environments/humanoid_2d_7_right_arm.py
- __MACOSX/codes/modular-rl/src/environments/._humanoid_2d_7_right_arm.py
- codes/modular-rl/src/environments/ModularEnv.py
- __MACOSX/codes/modular-rl/src/environments/._ModularEnv.py
- codes/modular-rl/src/algs/torchfold.py
- __MACOSX/codes/modular-rl/src/algs/._torchfold.py
- codes/modular-rl/src/algs/ModularActor.py
- __MACOSX/codes/modular-rl/src/algs/._ModularActor.py
- codes/modular-rl/src/algs/TD3.py
- __MACOSX/codes/modular-rl/src/algs/._TD3.py
- codes/modular-rl/src/algs/ModularCritic.py
- __MACOSX/codes/modular-rl/src/algs/._ModularCritic.py
- codes/modular-rl/src/algs/Synergy.py
- __MACOSX/codes/modular-rl/src/algs/._Synergy.py
- codes/modular-rl/src/algs/__init__.py
- __MACOSX/codes/modular-rl/src/algs/.___init__.py
- codes/modular-rl/src/algs/TransformerCritic.py
- __MACOSX/codes/modular-rl/src/algs/._TransformerCritic.py
- codes/modular-rl/src/algs/TransformerActor.py
- __MACOSX/codes/modular-rl/src/algs/._TransformerActor.py
- codes/modular-rl/src/algs/Transformer.py
- __MACOSX/codes/modular-rl/src/algs/._Transformer.py
- codes/modular-rl/src/vec_env/subproc_vec_env.py
- __MACOSX/codes/modular-rl/src/vec_env/._subproc_vec_env.py
- codes/modular-rl/src/vec_env/__init__.py
- __MACOSX/codes/modular-rl/src/vec_env/.___init__.py
- codes/modular-rl/src/vec_env/logger.py
- __MACOSX/codes/modular-rl/src/vec_env/._logger.py
- codes/modular-rl/src/environments/humanoids/humanoid_2d_7_lower_arms.xml
- __MACOSX/codes/modular-rl/src/environments/humanoids/._humanoid_2d_7_lower_arms.xml
- codes/modular-rl/src/environments/humanoids/humanoid_2d_8_right_knee.xml
- __MACOSX/codes/modular-rl/src/environments/humanoids/._humanoid_2d_8_right_knee.xml
- codes/modular-rl/src/environments/humanoids/humanoid_2d_8_left_knee.xml
- __MACOSX/codes/modular-rl/src/environments/humanoids/._humanoid_2d_8_left_knee.xml
- codes/modular-rl/src/environments/humanoids/humanoid_2d_7_right_arm.xml
- __MACOSX/codes/modular-rl/src/environments/humanoids/._humanoid_2d_7_right_arm.xml
- codes/modular-rl/src/environments/humanoids/humanoid_2d_7_left_arm.xml
- __MACOSX/codes/modular-rl/src/environments/humanoids/._humanoid_2d_7_left_arm.xml
- codes/modular-rl/src/environments/humanoids/humanoid_2d_9_full.xml
- __MACOSX/codes/modular-rl/src/environments/humanoids/._humanoid_2d_9_full.xml
- codes/modular-rl/src/environments/humanoids/humanoid_2d_7_left_leg.xml
- __MACOSX/codes/modular-rl/src/environments/humanoids/._humanoid_2d_7_left_leg.xml
- codes/modular-rl/src/environments/humanoids/humanoid_2d_7_right_leg.xml
- __MACOSX/codes/modular-rl/src/environments/humanoids/._humanoid_2d_7_right_leg.xml
- codes/modular-rl/src/environments/unimalA/floor-1409-0-3-01-15-56-55.xml
- __MACOSX/codes/modular-rl/src/environments/unimalA/._floor-1409-0-3-01-15-56-55.xml
- codes/modular-rl/src/environments/walker_humanoids_hopper/humanoid_2d_7_lower_arms.xml
- __MACOSX/codes/modular-rl/src/environments/walker_humanoids_hopper/._humanoid_2d_7_lower_arms.xml
- codes/modular-rl/src/environments/walker_humanoids_hopper/walker_5_main.xml
- __MACOSX/codes/modular-rl/src/environments/walker_humanoids_hopper/._walker_5_main.xml
- codes/modular-rl/src/environments/walker_humanoids_hopper/walker_4_main.xml
- __MACOSX/codes/modular-rl/src/environments/walker_humanoids_hopper/._walker_4_main.xml
- codes/modular-rl/src/environments/walker_humanoids_hopper/humanoid_2d_8_right_knee.xml
- __MACOSX/codes/modular-rl/src/environments/walker_humanoids_hopper/._humanoid_2d_8_right_knee.xml
- codes/modular-rl/src/environments/walker_humanoids_hopper/humanoid_2d_8_left_knee.xml
- __MACOSX/codes/modular-rl/src/environments/walker_humanoids_hopper/._humanoid_2d_8_left_knee.xml
- codes/modular-rl/src/environments/walker_humanoids_hopper/humanoid_2d_7_right_arm.xml
- __MACOSX/codes/modular-rl/src/environments/walker_humanoids_hopper/._humanoid_2d_7_right_arm.xml
- codes/modular-rl/src/environments/walker_humanoids_hopper/humanoid_2d_7_left_arm.xml
- __MACOSX/codes/modular-rl/src/environments/walker_humanoids_hopper/._humanoid_2d_7_left_arm.xml
- codes/modular-rl/src/environments/walker_humanoids_hopper/walker_2_main.xml
- __MACOSX/codes/modular-rl/src/environments/walker_humanoids_hopper/._walker_2_main.xml
- codes/modular-rl/src/environments/walker_humanoids_hopper/walker_3_main.xml
- __MACOSX/codes/modular-rl/src/environments/walker_humanoids_hopper/._walker_3_main.xml
- codes/modular-rl/src/environments/walker_humanoids_hopper/walker_6_main.xml
- __MACOSX/codes/modular-rl/src/environments/walker_humanoids_hopper/._walker_6_main.xml
- codes/modular-rl/src/environments/walker_humanoids_hopper/walker_7_main.xml
- __MACOSX/codes/modular-rl/src/environments/walker_humanoids_hopper/._walker_7_main.xml
- codes/modular-rl/src/environments/walker_humanoids_hopper/humanoid_2d_9_full.xml
- __MACOSX/codes/modular-rl/src/environments/walker_humanoids_hopper/._humanoid_2d_9_full.xml
- codes/modular-rl/src/environments/walker_humanoids_hopper/hopper_3.xml
- __MACOSX/codes/modular-rl/src/environments/walker_humanoids_hopper/._hopper_3.xml
- codes/modular-rl/src/environments/walker_humanoids_hopper/humanoid_2d_7_left_leg.xml
- __MACOSX/codes/modular-rl/src/environments/walker_humanoids_hopper/._humanoid_2d_7_left_leg.xml
- codes/modular-rl/src/environments/walker_humanoids_hopper/hopper_5.xml
- __MACOSX/codes/modular-rl/src/environments/walker_humanoids_hopper/._hopper_5.xml
- codes/modular-rl/src/environments/walker_humanoids_hopper/humanoid_2d_7_right_leg.xml
- __MACOSX/codes/modular-rl/src/environments/walker_humanoids_hopper/._humanoid_2d_7_right_leg.xml
- codes/modular-rl/src/environments/walker_humanoids_hopper/hopper_4.xml
- __MACOSX/codes/modular-rl/src/environments/walker_humanoids_hopper/._hopper_4.xml
- codes/modular-rl/src/environments/xmls/humanoid_2d_7_lower_arms.xml
- __MACOSX/codes/modular-rl/src/environments/xmls/._humanoid_2d_7_lower_arms.xml
- codes/modular-rl/src/environments/xmls/walker_5_main.xml
- __MACOSX/codes/modular-rl/src/environments/xmls/._walker_5_main.xml
- codes/modular-rl/src/environments/xmls/walker_4_main.xml
- __MACOSX/codes/modular-rl/src/environments/xmls/._walker_4_main.xml
- codes/modular-rl/src/environments/xmls/.DS_Store
- __MACOSX/codes/modular-rl/src/environments/xmls/._.DS_Store
- codes/modular-rl/src/environments/xmls/humanoid_2d_8_right_knee.xml
- __MACOSX/codes/modular-rl/src/environments/xmls/._humanoid_2d_8_right_knee.xml
- codes/modular-rl/src/environments/xmls/humanoid_2d_8_left_knee.xml
- __MACOSX/codes/modular-rl/src/environments/xmls/._humanoid_2d_8_left_knee.xml
- codes/modular-rl/src/environments/xmls/humanoid_2d_7_right_arm.xml
- __MACOSX/codes/modular-rl/src/environments/xmls/._humanoid_2d_7_right_arm.xml
- codes/modular-rl/src/environments/xmls/humanoid_2d_7_left_arm.xml
- __MACOSX/codes/modular-rl/src/environments/xmls/._humanoid_2d_7_left_arm.xml
- codes/modular-rl/src/environments/xmls/walker_2_main.xml
- __MACOSX/codes/modular-rl/src/environments/xmls/._walker_2_main.xml
- codes/modular-rl/src/environments/xmls/walker_3_main.xml
- __MACOSX/codes/modular-rl/src/environments/xmls/._walker_3_main.xml
- codes/modular-rl/src/environments/xmls/walker_6_main.xml
- __MACOSX/codes/modular-rl/src/environments/xmls/._walker_6_main.xml
- codes/modular-rl/src/environments/xmls/walker_7_main.xml
- __MACOSX/codes/modular-rl/src/environments/xmls/._walker_7_main.xml
- codes/modular-rl/src/environments/xmls/humanoid_2d_9_full.xml
- __MACOSX/codes/modular-rl/src/environments/xmls/._humanoid_2d_9_full.xml
- codes/modular-rl/src/environments/xmls/hopper_3.xml
- __MACOSX/codes/modular-rl/src/environments/xmls/._hopper_3.xml
- codes/modular-rl/src/environments/xmls/humanoid_2d_7_left_leg.xml
- __MACOSX/codes/modular-rl/src/environments/xmls/._humanoid_2d_7_left_leg.xml
- codes/modular-rl/src/environments/xmls/hopper_5.xml
- __MACOSX/codes/modular-rl/src/environments/xmls/._hopper_5.xml
- codes/modular-rl/src/environments/xmls/humanoid_2d_7_right_leg.xml
- __MACOSX/codes/modular-rl/src/environments/xmls/._humanoid_2d_7_right_leg.xml
- codes/modular-rl/src/environments/xmls/hopper_4.xml
- __MACOSX/codes/modular-rl/src/environments/xmls/._hopper_4.xml
- codes/modular-rl/src/environments/hoppers/hopper_3.xml
- __MACOSX/codes/modular-rl/src/environments/hoppers/._hopper_3.xml
- codes/modular-rl/src/environments/hoppers/hopper_5.xml
- __MACOSX/codes/modular-rl/src/environments/hoppers/._hopper_5.xml
- codes/modular-rl/src/environments/hoppers/hopper_4.xml
- __MACOSX/codes/modular-rl/src/environments/hoppers/._hopper_4.xml
- codes/modular-rl/src/environments/unimalC/floor-1409-3-17-01-11-13-22.xml
- __MACOSX/codes/modular-rl/src/environments/unimalC/._floor-1409-3-17-01-11-13-22.xml
- codes/modular-rl/src/environments/unimal/.DS_Store
- __MACOSX/codes/modular-rl/src/environments/unimal/._.DS_Store
- codes/modular-rl/src/environments/unimal/config.py
- __MACOSX/codes/modular-rl/src/environments/unimal/._config.py
- codes/modular-rl/src/environments/unimal/__init__.py
- __MACOSX/codes/modular-rl/src/environments/unimal/.___init__.py
- codes/modular-rl/src/environments/unimal/utils/
- __MACOSX/codes/modular-rl/src/environments/unimal/._utils
- codes/modular-rl/src/environments/unimal/yacs.py
- __MACOSX/codes/modular-rl/src/environments/unimal/._yacs.py
- codes/modular-rl/src/environments/unimal/configs/
- __MACOSX/codes/modular-rl/src/environments/unimal/._configs
- codes/modular-rl/src/environments/unimal/modular/
- __MACOSX/codes/modular-rl/src/environments/unimal/._modular
- codes/modular-rl/src/environments/unimal/envs/
- __MACOSX/codes/modular-rl/src/environments/unimal/._envs
- codes/modular-rl/src/environments/unimalB/floor-1409-0-7-01-15-15-26.xml
- __MACOSX/codes/modular-rl/src/environments/unimalB/._floor-1409-0-7-01-15-15-26.xml
- codes/modular-rl/src/environments/walkers/walker_5_main.xml
- __MACOSX/codes/modular-rl/src/environments/walkers/._walker_5_main.xml
- codes/modular-rl/src/environments/walkers/walker_4_main.xml
- __MACOSX/codes/modular-rl/src/environments/walkers/._walker_4_main.xml
- codes/modular-rl/src/environments/walkers/walker_2_main.xml
- __MACOSX/codes/modular-rl/src/environments/walkers/._walker_2_main.xml
- codes/modular-rl/src/environments/walkers/walker_3_main.xml
- __MACOSX/codes/modular-rl/src/environments/walkers/._walker_3_main.xml
- codes/modular-rl/src/environments/walkers/walker_6_main.xml
- __MACOSX/codes/modular-rl/src/environments/walkers/._walker_6_main.xml
- codes/modular-rl/src/environments/walkers/walker_7_main.xml
- __MACOSX/codes/modular-rl/src/environments/walkers/._walker_7_main.xml
- codes/modular-rl/src/environments/unimal/utils/exception.py
- __MACOSX/codes/modular-rl/src/environments/unimal/utils/._exception.py
- codes/modular-rl/src/environments/unimal/utils/mjpy.py
- __MACOSX/codes/modular-rl/src/environments/unimal/utils/._mjpy.py
- codes/modular-rl/src/environments/unimal/utils/geom.py
- __MACOSX/codes/modular-rl/src/environments/unimal/utils/._geom.py
- codes/modular-rl/src/environments/unimal/utils/xml.py
- __MACOSX/codes/modular-rl/src/environments/unimal/utils/._xml.py
- codes/modular-rl/src/environments/unimal/utils/__init__.py
- __MACOSX/codes/modular-rl/src/environments/unimal/utils/.___init__.py
- codes/modular-rl/src/environments/unimal/utils/spaces.py
- __MACOSX/codes/modular-rl/src/environments/unimal/utils/._spaces.py
- codes/modular-rl/src/environments/unimal/utils/camera.py
- __MACOSX/codes/modular-rl/src/environments/unimal/utils/._camera.py
- codes/modular-rl/src/environments/unimal/utils/file.py
- __MACOSX/codes/modular-rl/src/environments/unimal/utils/._file.py
- codes/modular-rl/src/environments/unimal/utils/sample.py
- __MACOSX/codes/modular-rl/src/environments/unimal/utils/._sample.py
- codes/modular-rl/src/environments/unimal/utils/placement.py
- __MACOSX/codes/modular-rl/src/environments/unimal/utils/._placement.py
- codes/modular-rl/src/environments/unimal/configs/csr.yaml
- __MACOSX/codes/modular-rl/src/environments/unimal/configs/._csr.yaml
- codes/modular-rl/src/environments/unimal/configs/obstacle.yaml
- __MACOSX/codes/modular-rl/src/environments/unimal/configs/._obstacle.yaml
- codes/modular-rl/src/environments/unimal/configs/ft.yaml
- __MACOSX/codes/modular-rl/src/environments/unimal/configs/._ft.yaml
- codes/modular-rl/src/environments/unimal/modular/xml/
- __MACOSX/codes/modular-rl/src/environments/unimal/modular/._xml
[truncated: 168 more entries]
