# Supplementary material
Source: ML conference proceedings conference paper supplement (https://proceedings.neurips.cc/paper_files/paper/2022/hash/7da6005a8d6942e8b328357da2872aed-Abstract.html)
Supplement: Supplementary file 1 [file 7da6005a8d6942e8b328357da2872aed-Supplemental-Conference.zip › codes/modular-rl/requirements.txt]

absl-py==0.9.0
asn1crypto==0.24.0
astor==0.8.1
cffi==1.14.0
cloudpickle==1.4.1
cryptography==2.1.4
future==0.18.2
gast==0.2.2
glfw==2.5.0
google-pasta==0.2.0
grpcio==1.28.1
gym==0.18.3
h5py==2.10.0
horovod==0.19.1
idna==2.6
imageio==2.5.0
Keras-Applications==1.0.8
Keras-Preprocessing==1.1.0
keyring==10.6.0
keyrings.alt==3.0
llvmlite==0.36.0
lockfile==0.12.2
lxml==4.8.0
Markdown==3.2.1
Cython==0.29.26
numba==0.53.0
numpy==1.18.3
Pillow==8.1.2
protobuf==3.17.0
psutil==5.7.0
pycparser==2.20
pycrypto==2.6.1
pyglet==1.5.15
PyGObject==3.26.1
pyxdg==0.25
PyYAML==5.3.1
pymongo==4.1.1
sacred==0.8.2
scipy==1.5.4
SecretStorage==2.3.1
six==1.16.0
tensorboard==1.15.0
tensorboardX==1.8
tensorflow-estimator==1.15.1
termcolor==1.1.0
torch==1.2.0
torchvision==0.4.0
torchfold==0.1.0
Werkzeug==1.0.1
wrapt==1.12.1
wandb==0.12.11
xmltodict==0.12.0
Cython==0.29.26
sklearn
