# Supplementary material
Source: ML conference proceedings conference paper supplement (https://proceedings.neurips.cc/paper_files/paper/2022/hash/7da6005a8d6942e8b328357da2872aed-Abstract.html)
Supplement: Supplementary file 1 [file 7da6005a8d6942e8b328357da2872aed-Supplemental-Conference.zip › codes/modular-rl/src/config.py]

ENV_DIR = "./environments"
XML_DIR = "./environments/xmls"
BASE_MODULAR_ENV_PATH = "./environments/ModularEnv.py"
DATA_DIR = "./results"
BUFFER_DIR = "./buffers"
VIDEO_DIR = "./results/videos"
VIDEO_RESOLUATION = (480, 480)
