# Supplementary material
Source: ML conference proceedings conference paper supplement (https://proceedings.neurips.cc/paper_files/paper/2022/hash/7da6005a8d6942e8b328357da2872aed-Abstract.html)
Supplement: Supplementary file 1 [file 7da6005a8d6942e8b328357da2872aed-Supplemental-Conference.zip › codes/modular-rl/src/environments/humanoids/humanoid_2d_8_left_knee.xml]

<mujoco model="humanoid">
    <include file="../../misc/skybox.xml" />
    <include file="../../misc/visual.xml" />
    <include file="../../misc/materials.xml" />
    <compiler angle="degree" inertiafromgeom="true"/>
    <default>
        <joint armature="1" damping="1" limited="true"/>
        <geom conaffinity="0" condim="3" contype="1" density="1000" friction=".7 .1 .1" material="self" />
        <motor ctrllimited="true" ctrlrange="-1 1"/>
    </default>
    <option integrator="RK4" timestep="0.002" />
    <visual>
        <map fogend="5" fogstart="3"/>
    </visual>
    <worldbody>
        <light cutoff="100" diffuse="1 1 1" dir="-1 -0 -1.5" directional="true" exponent="1" pos="0 0 1.3" specular=".1 .1 .1"/>
        <geom conaffinity="1" condim="3" material="grid" name="floor" pos="0 0 0" size="20 20 0.125" type="plane" />
        <!-- <geom condim="3" material="MatPlane" name="floor" pos="0 0 0" size="10 10 0.125" type="plane"/>-->
        <body name="torso" pos="0 0 1.4">
            <camera name="tilted" mode="trackcom" pos="3.6 4 -0.2" xyaxes="1 -.9 0 0 0 -1"/>
            <camera name="track" mode="trackcom" pos="0 4 0" xyaxes="1 0 0 0 0 -1"/>
            <joint armature="0.02" axis="1 0 0" damping="0" name="abdomen_x" pos="0 0 0" stiffness="0" type="slide" limited="false"/>
            <joint armature="0.02" axis="0 0 1" damping="0" name="abdomen_z" pos="0 0 0" ref="1.25" stiffness="0" type="slide" limited="false"/>
            <joint armature="0.02" axis="0 1 0" damping="0" name="abdomen_y" pos="0 0 1.1" stiffness="0" type="hinge" limited="false"/>
            <geom fromto="0 -.07 0 0 .07 0" name="torso1" size="0.07" type="capsule"/>
            <geom name="head" pos="0 0 .19" size=".09" type="sphere"/>
            <geom fromto="-.01 -.06 -.12 -.01 .06 -.12" name="uwaist" size="0.06" type="capsule"/>
            <geom fromto="-.01 -.06 -0.260 -.01 .06 -0.260" name="lwaist" size="0.06" quat="1.000 0 -0.002 0" type="capsule"/>
            <geom fromto="-.02 -.07 -0.425 -.02 .07 -0.425" name="butt" size="0.09" quat="1.000 0 -0.002 0" type="capsule"/>
            
            <body name="right_thigh" pos="0 -0.1 -0.465">
                <joint armature="0.0080" axis="0 1 0" damping="5" name="right_hip_y" pos="0 0 0" range="-110 20" stiffness="20" type="hinge"/>
                <geom fromto="0 0 0 0 0.01 -.34" name="right_thigh1" size="0.06" type="capsule"/>
                <body name="right_shin" pos="0 0.01 -0.403">
                    <joint armature="0.0060" axis="0 -1 0" name="right_knee" pos="0 0 .02" range="-160 -2" type="hinge"/>
                    <geom fromto="0 0 0 0 0 -.3" name="right_shin1" size="0.049" type="capsule"/>
                    <geom name="right_foot" pos="0 0 -0.35" size="0.075" type="sphere"/>
                </body>
            </body>
            <body name="left_thigh" pos="0 0.1 -0.465">
                <joint armature="0.01" axis="0 1 0" damping="5" name="left_hip_y" pos="0 0 0" range="-110 20" stiffness="20" type="hinge"/>
                <geom fromto="0 0 0 0 -0.01 -.34" name="left_thigh1" size="0.06" type="capsule"/>
            </body>

            <body name="right_upper_arm" pos="0 -0.17 0.06">
                <joint armature="0.0060" axis="0 -1 0" name="right_shoulder1" pos="0 0 0" range="-85 60" stiffness="1" type="hinge"/>
                <geom fromto="0 0 0 .16 -.16 -.16" name="right_uarm1" size="0.04 0.16" type="capsule"/>
                <body name="right_lower_arm" pos=".18 -.18 -.18">
                    <joint armature="0.0028" axis="0 -1 0" name="right_elbow" pos="0 0 0" range="-90 50" stiffness="0" type="hinge"/>
                    <geom fromto="0.01 0.01 0.01 .17 .17 .17" name="right_larm" size="0.031" type="capsule"/>
                    <geom name="right_hand" pos=".18 .18 .18" size="0.04" type="sphere"/>
                    <camera pos="0 0 0"/>
                </body>
            </body>
            <body name="left_upper_arm" pos="0 0.17 0.06">
                <joint armature="0.0060" axis="0 -1 0" name="left_shoulder1" pos="0 0 0" range="-60 85" stiffness="1" type="hinge"/>
                <geom fromto="0 0 0 .16 .16 -.16" name="left_uarm1" size="0.04 0.16" type="capsule"/>
                <body name="left_lower_arm" pos=".18 .18 -.18">
                    <joint armature="0.0028" axis="0 -1 0" name="left_elbow" pos="0 0 0" range="-90 50" stiffness="0" type="hinge"/>
                    <geom fromto="0.01 -0.01 0.01 .17 -.17 .17" name="left_larm" size="0.031" type="capsule"/>
                    <geom name="left_hand" pos=".18 -.18 .18" size="0.04" type="sphere"/>
                </body>
            </body>
            
        </body>
    </worldbody>


    <actuator>
        <!--<motor gear="100" joint="abdomen_y" name="abdomen_y"/>-->
        <motor gear="150" joint="right_hip_y" name="right_hip_y"/>
        <motor gear="100" joint="right_knee" name="right_knee"/>
        <motor gear="150" joint="left_hip_y" name="left_hip_y"/>
        <motor gear="12.5" joint="right_shoulder1" name="right_shoulder1"/>
        <motor gear="12.5" joint="right_elbow" name="right_elbow"/>
        <motor gear="12.5" joint="left_shoulder1" name="left_shoulder1"/>
        <motor gear="12.5" joint="left_elbow" name="left_elbow"/>
    </actuator>
</mujoco>
