# Supplementary material
Source: ML conference proceedings conference paper supplement (https://proceedings.neurips.cc/paper_files/paper/2022/hash/7da6005a8d6942e8b328357da2872aed-Abstract.html)
Supplement: Supplementary file 1 [file 7da6005a8d6942e8b328357da2872aed-Supplemental-Conference.zip › codes/modular-rl/src/environments/unimal/__init__.py]

from gym.envs.registration import register

register(
    id="Unimal-v0",
    entry_point="metamorph.envs.tasks.task:make_env",
    max_episode_steps=1000,
)

register(
    id="GeneralWalker2D-v0",
    entry_point="metamorph.envs.tasks.gen_walker_2d:make_env",
    max_episode_steps=1000,
)

CUSTOM_ENVS = ["Unimal-v0", "GeneralWalker2D-v0"]
