# Supplementary material
Source: ML conference proceedings conference paper supplement (https://proceedings.neurips.cc/paper_files/paper/2022/hash/7da6005a8d6942e8b328357da2872aed-Abstract.html)
Supplement: Supplementary file 1 [file 7da6005a8d6942e8b328357da2872aed-Supplemental-Conference.zip › codes/modular-rl/src/environments/unimal/configs/csr.yaml]

RNG_SEED: 1409
ENV:
  MODULES: ["Agent", "Terrain"]
  STAND_HEIGHT_RATIO: 0.3
  KEYS_TO_KEEP: ["hfield"]
MODEL:
  TRANSFORMER:
    EXT_HIDDEN_DIMS: [64, 64]
    DECODER_DIMS: [64]
    EXT_MIX: "late"
TERRAIN:
  SIZE: [55, 20, 1]
  START_FLAT: 3
  CENTER_FLAT: 0
  FLAT_LENGTH_RANGE: [1, 3, 1]
  TYPES: ["curve_slope", "steps", "rugged_square"]
  BOUNDARY_WALLS: False
HFIELD:
  OBS_SIZE: [1, 4, 4, 4]
