# Supplementary material
Source: ML conference proceedings conference paper supplement (https://proceedings.neurips.cc/paper_files/paper/2022/hash/7da6005a8d6942e8b328357da2872aed-Abstract.html)
Supplement: Supplementary file 1 [file 7da6005a8d6942e8b328357da2872aed-Supplemental-Conference.zip › codes/modular-rl/src/environments/unimal/configs/ft.yaml]

RNG_SEED: 1409
ENV:
  MODULES: ["Agent", "Floor"]
TERRAIN:
  SIZE: [100, 100, 1]
