# Supplementary material
Source: ML conference proceedings conference paper supplement (https://proceedings.neurips.cc/paper_files/paper/2022/hash/7da6005a8d6942e8b328357da2872aed-Abstract.html)
Supplement: Supplementary file 1 [file 7da6005a8d6942e8b328357da2872aed-Supplemental-Conference.zip › codes/modular-rl/src/environments/unimal/envs/modules/floor.py]

from environments.unimal.config import cfg
from environments.unimal.utils import xml as xu


class Floor:
    """Module to add floor to env."""

    def __init__(self, random_state=None):
        self.np_random = random_state

    def modify_xml_step(self, env, root, tree):
        size = cfg.TERRAIN.SIZE
        floor_elem = xu.floor_segm("floor/0", [0, 0, 0], size, "box", "grid")
        worldbody = root.findall("./worldbody")[0]
        worldbody.insert(1, floor_elem)
        # xu.save_etree_as_xml(tree, "1.xml")

    def modify_sim_step(self, env, sim):
        return

    def observation_step(self, env, sim):
        return {}
