# Supplementary material
Source: ML conference proceedings conference paper supplement (https://proceedings.neurips.cc/paper_files/paper/2022/hash/7da6005a8d6942e8b328357da2872aed-Abstract.html)
Supplement: Supplementary file 1 [file 7da6005a8d6942e8b328357da2872aed-Supplemental-Conference.zip › codes/modular-rl/src/environments/unimal/envs/tasks/escape_bowl.py]

import numpy as np
from gym import utils

from environments.unimal.config import cfg
from environments.unimal.envs.modules.agent import Agent
from environments.unimal.envs.modules.bowl import Bowl
from environments.unimal.envs.tasks.unimal import UnimalEnv
from environments.unimal.envs.wrappers.hfield import HfieldObs2D
from environments.unimal.envs.wrappers.hfield import StandReward
from environments.unimal.envs.wrappers.hfield import TerminateOnFalling
from environments.unimal.envs.wrappers.hfield import TerminateOnEscape
from environments.unimal.envs.wrappers.hfield import UnimalHeightObs
from environments.unimal.envs.wrappers.multi_env_wrapper import MultiUnimalNodeCentricAction
from environments.unimal.envs.wrappers.multi_env_wrapper import MultiUnimalNodeCentricObservation


class EscapeBowlTask(UnimalEnv, utils.EzPickle):
    def __init__(self, xml_str, unimal_id, xml_path):
        UnimalEnv.__init__(self, xml_str, unimal_id, xml_path)

    ###########################################################################
    # Sim step and reset
    ###########################################################################

    def step(self, action):
        xy_pos_before = self.sim.data.get_body_xpos("torso/0")[:2].copy()
        self.do_simulation(action)
        xy_pos_after = self.sim.data.get_body_xpos("torso/0")[:2].copy()

        # Give reward if distance from initial position has increased
        reward_forward = (
            np.linalg.norm(xy_pos_after) - np.linalg.norm(xy_pos_before)
        ) * cfg.ENV.FORWARD_REWARD_WEIGHT

        ctrl_cost = self.control_cost(action)
        reward = reward_forward - ctrl_cost
        observation = self._get_obs()

        info = {
            "x_pos": xy_pos_after[0],
            "y_pos": xy_pos_after[1],
            "xy_pos_before": xy_pos_before,
            "xy_pos_after": xy_pos_after,
            "__reward__energy": self.calculate_energy(),
            "__reward__ctrl": ctrl_cost,
            "__reward__forward": reward_forward,
            "metric": np.linalg.norm(xy_pos_after),
            "name": self.unimal_id
        }

        # Update viewer with markers, if any
        if self.viewer is not None:
            self.viewer._markers[:] = []
            for marker in self.metadata["markers"]:
                self.viewer.add_marker(**marker)

        return observation, reward, False, info


def make_env_escape_bowl(xml, unimal_id, xml_path):
    env = EscapeBowlTask(xml, unimal_id, xml_path)
    # Add modules
    for module in cfg.ENV.MODULES:
        env.add_module(globals()[module])
    env.reset()
    # Add all wrappers
    env = UnimalHeightObs(env)
    env = StandReward(env)
    env = TerminateOnFalling(env)
    env = HfieldObs2D(env)
    env = TerminateOnEscape(env)

    for wrapper_func in cfg.MODEL.WRAPPERS:
        env = globals()[wrapper_func](env)
    return env
