# Supplementary material
Source: ML conference proceedings conference paper supplement (https://proceedings.neurips.cc/paper_files/paper/2022/hash/7da6005a8d6942e8b328357da2872aed-Abstract.html)
Supplement: Supplementary file 1 [file 7da6005a8d6942e8b328357da2872aed-Supplemental-Conference.zip › codes/modular-rl/src/environments/unimal/envs/tasks/obstacle.py]

from gym import utils

from environments.unimal.config import cfg
from environments.unimal.envs.modules.agent import Agent
from environments.unimal.envs.modules.objects import Objects
from environments.unimal.envs.modules.terrain import Terrain
from environments.unimal.envs.tasks.unimal import UnimalEnv
from environments.unimal.envs.wrappers.hfield import HfieldObs2D
from environments.unimal.envs.wrappers.hfield import StandReward
from environments.unimal.envs.wrappers.hfield import TerminateOnFalling
from environments.unimal.envs.wrappers.hfield import TerminateOnTerrainEdge
from environments.unimal.envs.wrappers.hfield import UnimalHeightObs
from environments.unimal.envs.wrappers.multi_env_wrapper import MultiUnimalNodeCentricAction
from environments.unimal.envs.wrappers.multi_env_wrapper import MultiUnimalNodeCentricObservation


class ObstacleTask(UnimalEnv, utils.EzPickle):
    def __init__(self, xml_str, unimal_id, xml_path):
        UnimalEnv.__init__(self, xml_str, unimal_id, xml_path)

    ###########################################################################
    # Sim step and reset
    ###########################################################################

    def step(self, action):
        xy_pos_before = self.sim.data.get_body_xpos("torso/0")[:2].copy()
        mj_step_error = self.do_simulation(action)
        xy_pos_after = self.sim.data.get_body_xpos("torso/0")[:2].copy()

        xy_vel = (xy_pos_after - xy_pos_before) / self.dt
        x_vel, y_vel = xy_vel

        forward_reward = cfg.ENV.FORWARD_REWARD_WEIGHT * x_vel

        ctrl_cost = self.control_cost(action)
        reward = forward_reward - ctrl_cost
        observation = self._get_obs()

        info = {
            "__reward__ctrl": ctrl_cost,
            "__reward__energy": self.calculate_energy(),
            "x_pos": xy_pos_after[0],
            "x_vel": x_vel,
            "xy_pos_before": xy_pos_before,
            "xy_pos_after": xy_pos_after,
            "__reward__forward": forward_reward,
            "metric": xy_pos_after[0],
            "name": self.unimal_id,
            "mj_step_error": mj_step_error
        }

        return observation, reward, False, info


def make_env_obstacle(xml, unimal_id, xml_path):
    env = ObstacleTask(xml, unimal_id, xml_path)
    # Add modules
    for module in cfg.ENV.MODULES:
        env.add_module(globals()[module])
    # Reset is needed to setup observation spaces, sim etc which might be
    # needed by wrappers
    env.reset()
    # Add all wrappers
    env = UnimalHeightObs(env)
    env = StandReward(env)
    env = TerminateOnFalling(env)
    env = HfieldObs2D(env)
    env = TerminateOnTerrainEdge(env)

    for wrapper_func in cfg.MODEL.WRAPPERS:
        env = globals()[wrapper_func](env)
    return env
