# Supplementary material
Source: ML conference proceedings conference paper supplement (https://proceedings.neurips.cc/paper_files/paper/2022/hash/7da6005a8d6942e8b328357da2872aed-Abstract.html)
Supplement: Supplementary file 1 [file 7da6005a8d6942e8b328357da2872aed-Supplemental-Conference.zip › codes/modular-rl/src/environments/unimal/envs/tasks/unimal.py]

import os
from collections import OrderedDict

import gym
import mujoco_py
import numpy as np
from gym import spaces
from gym.utils import seeding

from environments.unimal.config import cfg
from environments.unimal.utils import exception as exu
from environments.unimal.utils import file as fu
from environments.unimal.utils import spaces as spu
from environments.unimal.utils import sample as su
from environments.unimal.utils import xml as xu
from environments.unimal.envs.modules.agent import create_agent_xml


DEFAULT_SIZE = 1024
DEFAULT_CAMERA_CONFIG = {
    "trackbodyid": 2,
    "distance": 3.0,
    "lookat": np.array((0.0, 0.0, 1.15)),
    "elevation": -20.0,
}


class UnimalEnv(gym.Env):
    """Superclass for all Unimal tasks."""

    def __init__(self, xml_str, unimal_id, xml_path):
        self.frame_skip = 4
        self.unimal_id = unimal_id

        self.viewer = None
        self._viewers = {}

        self.xml_str = xml_str
        self.xml_variants = None

        self.metadata = {
            "render.modes": ["human", "rgb_array", "depth_array"],
            "unimal_id": unimal_id,
            "markers": [],
            "metadata": self._load_unimal_metadata(),
            "mirrored": False,
        }
        root, tree = xu.etree_from_xml(xml_str, ispath=False)
        xml_str = xu.etree_to_str(root)
        self.model = mujoco_py.load_model_from_xml(xml_str)
        self.xml = xml_path


        self.observation_space = None
        self.sim = None
        self.module_classes = []
        self.modules = OrderedDict()
        self.seed()
        self.unimal_xmls = self._load_all_unimals()

    def _load_all_unimals(self):
        dir_path = os.path.join(cfg.ENV.WALKER_DIR, "xml")
        xml_paths = [
            os.path.join(dir_path, "{}.xml".format(walker_name))
            for walker_name in cfg.ENV.WALKERS
        ]
        return [create_agent_xml(path) for path in xml_paths]

    def _load_unimal_metadata(self):
        path = os.path.join(cfg.ENV.WALKER_DIR, "metadata", "{}.json".format(self.unimal_id))
        return fu.load_json(path)

    def add_module(self, cname):
        self.module_classes.append(cname)

    def _init_modules(self):
        self.modules = OrderedDict()
        for cname in self.module_classes:
            module = cname()
            name_str = module.__class__.__name__
            self.modules[name_str] = module
            self.modules[name_str].np_random = self.np_random

    def _get_obs(self):
        obs = {}
        for _, module in self.modules.items():
            obs.update(module.observation_step(self, self.sim))
        return obs

    def _get_sim(self):
        xml_str = self.xml_str

        root, tree = xu.etree_from_xml(xml_str, ispath=False)
        self._init_modules()
        # Modify the xml
        for _, module in self.modules.items():
            module.modify_xml_step(self, root, tree)

        xml_str = xu.etree_to_str(root)
        model = mujoco_py.load_model_from_xml(xml_str)
        sim = mujoco_py.MjSim(model)
        # Update module fields which require sim
        for _, module in self.modules.items():
            module.modify_sim_step(self, sim)
        return sim

    def update(self, unimal_id, idx):
        self.metadata["unimal_id"] = unimal_id
        self.metadata["agent_idx"] = idx
        self.unimal_id = unimal_id
        self.metadata["mirrored"] = su.sample_from_list(
            [True, False], self.np_random
        )
        self.xml_str = self.unimal_xmls[idx]

    ###########################################################################
    # Functions to setup env attributes
    ###########################################################################

    @property
    def dt(self):
        return self.sim.model.opt.timestep * self.frame_skip

    def _set_action_space(self):
        bounds = self.sim.model.actuator_ctrlrange.copy().astype(np.float32)
        low, high = bounds.T
        self.action_space = spaces.Box(low=low, high=high, dtype=np.float32)
        return self.action_space

    def seed(self, seed=None):
        if isinstance(seed, list):
            seed = seed[0]
        self.np_random, seed = seeding.np_random(seed)
        return [seed]

    ###########################################################################
    # Common rewards and costs
    ###########################################################################
    def control_cost(self, action):
        control_cost = cfg.ENV.CTRL_COST_WEIGHT * np.sum(np.square(action))
        return control_cost

    def calculate_energy(self):
        if cfg.HFIELD.DIM == 1:
            torque = self.sim.data.qfrc_actuator[3:]
        else:
            torque = self.sim.data.qfrc_actuator[1:]
        return int(np.sum(np.absolute(torque)))

    ###########################################################################
    # Reset sim
    ###########################################################################
    def reset(self):
        if self.sim is None or cfg.ENV.NEW_SIM_ON_RESET:
            self.sim = self._get_sim()
        else:
            self.sim.reset()
        self.step_count = 0

        if self.viewer is not None:
            self.viewer.update_sim(self.sim)
        obs = self.reset_model()
        self._set_action_space()
        # This is just a temp initialization, the final obs space will depend
        # on SelectKeysWrapper
        self.observation_space = spu.convert_obs_to_space(obs)
        self.metadata["video.frames_per_second"] = int(np.round(1.0 / self.dt))
        return obs

    def reset_model(self):
        noise_low = -cfg.ENV.RESET_NOISE_SCALE
        noise_high = cfg.ENV.RESET_NOISE_SCALE

        init_qpos = self.sim.data.qpos.ravel().copy()
        init_qvel = self.sim.data.qvel.ravel().copy()

        qpos_idx = self.modules["Agent"].agent_qpos_idxs
        qvel_idx = self.modules["Agent"].agent_qvel_idxs

        init_qpos[qpos_idx] = init_qpos[qpos_idx] + self.np_random.uniform(
            low=noise_low, high=noise_high, size=len(qpos_idx)
        )
        init_qvel[qvel_idx] = init_qvel[qvel_idx] + self.np_random.uniform(
            low=noise_low, high=noise_high, size=len(qvel_idx)
        )

        self.set_state(init_qpos, init_qvel)

        observation = self._get_obs()
        return observation

    def set_state(self, qpos, qvel):
        assert qpos.shape == (self.sim.model.nq,) and qvel.shape == (
            self.sim.model.nv,
        )
        old_state = self.sim.get_state()
        new_state = mujoco_py.MjSimState(
            old_state.time, qpos, qvel, old_state.act, old_state.udd_state
        )
        self.sim.set_state(new_state)
        self.sim.forward()

    ###########################################################################
    # MjStep
    ###########################################################################

    def do_simulation(self, ctrl):
        self.step_count += 1
        self.sim.data.ctrl[:] = ctrl
        for _ in range(self.frame_skip):
            try:
                self.sim.step()
            except Exception as e:
                uid = self.metadata["unimal_id"]
                if cfg.EXIT_ON_MJ_STEP_EXCEPTION:
                    exu.handle_exception(
                        e, "ERROR in MjStep: {}".format(uid), unimal_id=uid
                    )
                print("ERROR in MjStep: {}".format(uid))
                return True
        return False

    ###########################################################################
    # Viewing and rendering methods
    ###########################################################################

    def render(
        self,
        mode="human",
        width=DEFAULT_SIZE,
        height=DEFAULT_SIZE,
        camera_id=None,
        camera_name=None,
    ):
        if mode == "rgb_array":
            if camera_id is not None and camera_name is not None:
                raise ValueError(
                    "Both `camera_id` and `camera_name` cannot be"
                    " specified at the same time."
                )

            no_camera_specified = camera_name is None and camera_id is None
            if no_camera_specified:
                camera_name = "side"

            if (
                camera_id is None
                and camera_name in self.sim.model._camera_name2id
            ):
                camera_id = self.sim.model.camera_name2id(camera_name)

            self._get_viewer(mode).render(width, height, camera_id=camera_id)
            # window size used for old mujoco-py:
            data = self._get_viewer(mode).read_pixels(width, height, depth=False)
            # original image is upside-down, so flip it
            return data[::-1, :, :]
        elif mode == "depth_array":
            self._get_viewer(mode).render(width, height)
            # window size used for old mujoco-py:
            # Extract depth part of the read_pixels() tuple
            data = self._get_viewer(mode).read_pixels(width, height, depth=True)[
                1
            ]
            # original image is upside-down, so flip it
            return data[::-1, :]
        elif mode == "human":
            self._get_viewer(mode).render()

    def _get_viewer(self, mode):
        self.viewer = self._viewers.get(mode)
        if self.viewer is None:
            if mode == "human":
                self.viewer = mujoco_py.MjViewer(self.sim)
            elif mode == "rgb_array" or mode == "depth_array":
                self.viewer = mujoco_py.MjRenderContextOffscreen(self.sim, -1)

            self.viewer_setup()
            self._viewers[mode] = self.viewer
        return self.viewer

    def viewer_setup(self):
        for key, value in DEFAULT_CAMERA_CONFIG.items():
            if isinstance(value, np.ndarray):
                getattr(self.viewer.cam, key)[:] = value
            else:
                setattr(self.viewer.cam, key, value)

    def close(self):
        if self.viewer is not None:
            # self.viewer.finish()
            self.viewer = None
            self._viewers = {}
