# Supplementary material
Source: ML conference proceedings conference paper supplement (https://proceedings.neurips.cc/paper_files/paper/2022/hash/7da6005a8d6942e8b328357da2872aed-Abstract.html)
Supplement: Supplementary file 1 [file 7da6005a8d6942e8b328357da2872aed-Supplemental-Conference.zip › codes/modular-rl/src/environments/unimal/envs/vec_env/dummy_vec_env.py]

import numpy as np

from .utils import copy_obs_dict
from .utils import dict_to_obs
from .utils import obs_space_info
from .vec_env import VecEnv


class DummyVecEnv(VecEnv):
    """
    VecEnv that does runs multiple environments sequentially, that is,
    the step and reset commands are send to one environment at a time.
    Useful when debugging and when num_env == 1 (in the latter case,
    avoids communication overhead)
    """

    def __init__(self, env_fns):
        """
        Arguments:

        env_fns: iterable of callables      functions that build environments
        """
        self.envs = [fn() for fn in env_fns]
        env = self.envs[0]
        VecEnv.__init__(
            self, len(env_fns), env.observation_space, env.action_space
        )
        obs_space = env.observation_space
        self.keys, shapes, dtypes = obs_space_info(obs_space)

        self.buf_obs = {
            k: np.zeros((self.num_envs,) + tuple(shapes[k]), dtype=dtypes[k])
            for k in self.keys
        }
        self.buf_dones = np.zeros((self.num_envs,), dtype=np.bool)
        self.buf_rews = np.zeros((self.num_envs,), dtype=np.float32)
        self.buf_infos = [{} for _ in range(self.num_envs)]
        self.actions = None
        self.spec = self.envs[0].spec

    def step_async(self, actions):
        listify = True
        try:
            if len(actions) == self.num_envs:
                listify = False
        except TypeError:
            pass

        if not listify:
            self.actions = actions
        else:
            assert (
                self.num_envs == 1
            ), "actions {} is either not a list or has a wrong size - cannot match to {} environments".format(
                actions, self.num_envs
            )
            self.actions = [actions]

    def step_wait(self):
        for e in range(self.num_envs):
            action = self.actions[e]
            # if isinstance(self.envs[e].action_space, spaces.Discrete):
            #    action = int(action)

            (
                obs,
                self.buf_rews[e],
                self.buf_dones[e],
                self.buf_infos[e],
            ) = self.envs[e].step(action)
            if self.buf_dones[e]:
                obs = self.envs[e].reset()
            self._save_obs(e, obs)
        return (
            self._obs_from_buf(),
            np.copy(self.buf_rews),
            np.copy(self.buf_dones),
            self.buf_infos.copy(),
        )

    def reset(self):
        for e in range(self.num_envs):
            obs = self.envs[e].reset()
            self._save_obs(e, obs)
        return self._obs_from_buf()

    def _save_obs(self, e, obs):
        for k in self.keys:
            if k is None:
                self.buf_obs[k][e] = obs
            else:
                self.buf_obs[k][e] = obs[k]

    def _obs_from_buf(self):
        return dict_to_obs(copy_obs_dict(self.buf_obs))

    def get_images(self):
        return [env.render(mode="rgb_array") for env in self.envs]

    def render(self, mode="human"):
        if self.num_envs == 1:
            return self.envs[0].render(mode=mode)
        else:
            return super().render(mode=mode)
