# Supplementary material
Source: ML conference proceedings conference paper supplement (https://proceedings.neurips.cc/paper_files/paper/2022/hash/7da6005a8d6942e8b328357da2872aed-Abstract.html)
Supplement: Supplementary file 1 [file 7da6005a8d6942e8b328357da2872aed-Supplemental-Conference.zip › codes/modular-rl/src/environments/unimal/envs/vec_env/subproc_vec_env.py]

import multiprocessing as mp

import numpy as np

from .vec_env import CloudpickleWrapper
from .vec_env import VecEnv
from .vec_env import clear_mpi_env_vars


def worker(remote, parent_remote, env_fn_wrappers):
    def step_env(env, action):
        ob, reward, done, info = env.step(action)
        if done:
            ob = env.reset()
        return ob, reward, done, info

    parent_remote.close()
    envs = [env_fn_wrapper() for env_fn_wrapper in env_fn_wrappers.x]
    try:
        while True:
            cmd, data = remote.recv()
            if cmd == "step":
                remote.send(
                    [step_env(env, action) for env, action in zip(envs, data)]
                )
            elif cmd == "reset":
                remote.send([env.reset() for env in envs])
            elif cmd == "render":
                remote.send([env.render(mode="rgb_array") for env in envs])
            elif cmd == "close":
                remote.close()
                break
            elif cmd == "get_spaces_spec":
                remote.send(
                    CloudpickleWrapper(
                        (
                            envs[0].observation_space,
                            envs[0].action_space,
                            envs[0].spec,
                        )
                    )
                )
            else:
                raise NotImplementedError
    except KeyboardInterrupt:
        print("SubprocVecEnv worker: got KeyboardInterrupt")
    finally:
        for env in envs:
            env.close()


class SubprocVecEnv(VecEnv):
    """
    VecEnv that runs multiple environments in parallel in subproceses and communicates with them via pipes.
    Recommended to use when num_envs > 1 and step() can be a bottleneck.
    """

    def __init__(self, env_fns, spaces=None, context="spawn", in_series=1):
        """
        Arguments:

        env_fns: iterable of callables -  functions that create environments to run in subprocesses. Need to be cloud-pickleable
        in_series: number of environments to run in series in a single process
        (e.g. when len(env_fns) == 12 and in_series == 3, it will run 4 processes, each running 3 envs in series)
        """
        self.waiting = False
        self.closed = False
        self.in_series = in_series
        nenvs = len(env_fns)
        assert (
            nenvs % in_series == 0
        ), "Number of envs must be divisible by number of envs to run in series"
        self.nremotes = nenvs // in_series
        env_fns = np.array_split(env_fns, self.nremotes)
        ctx = mp.get_context(context)
        self.remotes, self.work_remotes = zip(
            *[ctx.Pipe() for _ in range(self.nremotes)]
        )
        self.ps = [
            ctx.Process(
                target=worker,
                args=(work_remote, remote, CloudpickleWrapper(env_fn)),
            )
            for (work_remote, remote, env_fn) in zip(
                self.work_remotes, self.remotes, env_fns
            )
        ]
        for p in self.ps:
            p.daemon = True  # if the main process crashes, we should not cause things to hang
            with clear_mpi_env_vars():
                p.start()
        for remote in self.work_remotes:
            remote.close()

        self.remotes[0].send(("get_spaces_spec", None))
        observation_space, action_space, self.spec = self.remotes[0].recv().x
        self.viewer = None
        VecEnv.__init__(self, nenvs, observation_space, action_space)

    def step_async(self, actions):
        self._assert_not_closed()
        actions = np.array_split(actions, self.nremotes)
        for remote, action in zip(self.remotes, actions):
            remote.send(("step", action))
        self.waiting = True

    def step_wait(self):
        self._assert_not_closed()
        results = [remote.recv() for remote in self.remotes]
        results = _flatten_list(results)
        self.waiting = False
        obs, rews, dones, infos = zip(*results)
        return _flatten_obs(obs), np.stack(rews), np.stack(dones), infos

    def reset(self):
        self._assert_not_closed()
        for remote in self.remotes:
            remote.send(("reset", None))
        obs = [remote.recv() for remote in self.remotes]
        obs = _flatten_list(obs)
        return _flatten_obs(obs)

    def close_extras(self):
        self.closed = True
        if self.waiting:
            for remote in self.remotes:
                remote.recv()
        for remote in self.remotes:
            remote.send(("close", None))
        for p in self.ps:
            p.join()

    def get_images(self):
        self._assert_not_closed()
        for pipe in self.remotes:
            pipe.send(("render", None))
        imgs = [pipe.recv() for pipe in self.remotes]
        imgs = _flatten_list(imgs)
        return imgs

    def _assert_not_closed(self):
        assert (
            not self.closed
        ), "Trying to operate on a SubprocVecEnv after calling close()"

    def __del__(self):
        if not self.closed:
            self.close()


def _flatten_obs(obs):
    assert isinstance(obs, (list, tuple))
    assert len(obs) > 0

    if isinstance(obs[0], dict):
        keys = obs[0].keys()
        return {k: np.stack([o[k] for o in obs]) for k in keys}
    else:
        return np.stack(obs)


def _flatten_list(l):
    assert isinstance(l, (list, tuple))
    assert len(l) > 0
    assert all([len(l_) > 0 for l_ in l])

    return [l__ for l_ in l for l__ in l_]
