# Supplementary material
Source: ML conference proceedings conference paper supplement (https://proceedings.neurips.cc/paper_files/paper/2022/hash/7da6005a8d6942e8b328357da2872aed-Abstract.html)
Supplement: Supplementary file 1 [file 7da6005a8d6942e8b328357da2872aed-Supplemental-Conference.zip › codes/modular-rl/src/environments/unimal/envs/vec_env/utils.py]

"""
Helpers for dealing with vectorized environments.
"""

from collections import OrderedDict

import gym
import numpy as np


def copy_obs_dict(obs):
    """
    Deep-copy an observation dict.
    """
    return {k: np.copy(v) for k, v in obs.items()}


def dict_to_obs(obs_dict):
    """
    Convert an observation dict into a raw array if the
    original observation space was not a Dict space.
    """
    if set(obs_dict.keys()) == {None}:
        return obs_dict[None]
    return obs_dict


def obs_space_info(obs_space):
    """
    Get dict-structured information about a gym.Space.

    Returns:
      A tuple (keys, shapes, dtypes):
        keys: a list of dict keys.
        shapes: a dict mapping keys to shapes.
        dtypes: a dict mapping keys to dtypes.
    """
    if isinstance(obs_space, gym.spaces.Dict):
        assert isinstance(obs_space.spaces, OrderedDict)
        subspaces = obs_space.spaces
    elif isinstance(obs_space, gym.spaces.Tuple):
        assert isinstance(obs_space.spaces, tuple)
        subspaces = {i: obs_space.spaces[i] for i in range(len(obs_space.spaces))}
    else:
        subspaces = {None: obs_space}
    keys = []
    shapes = {}
    dtypes = {}
    for key, box in subspaces.items():
        keys.append(key)
        shapes[key] = box.shape
        dtypes[key] = box.dtype
    return keys, shapes, dtypes


def obs_to_dict(obs):
    """
    Convert an observation into a dict.
    """
    if isinstance(obs, dict):
        return obs
    return {None: obs}


def tile_images(img_nhwc):
    """
    Tile N images into one big PxQ image
    (P,Q) are chosen to be as close as possible, and if N
    is square, then P=Q.

    input: img_nhwc, list or array of images, ndim=4 once turned into array
        n = batch index, h = height, w = width, c = channel
    returns:
        bigim_HWc, ndarray with ndim=3
    """
    img_nhwc = np.asarray(img_nhwc)
    N, h, w, c = img_nhwc.shape
    H = int(np.ceil(np.sqrt(N)))
    W = int(np.ceil(float(N) / H))
    img_nhwc = np.array(
        list(img_nhwc) + [img_nhwc[0] * 0 for _ in range(N, H * W)]
    )
    img_HWhwc = img_nhwc.reshape(H, W, h, w, c)
    img_HhWwc = img_HWhwc.transpose(0, 2, 1, 3, 4)
    img_Hh_Ww_c = img_HhWwc.reshape(H * h, W * w, c)
    return img_Hh_Ww_c
