# Supplementary material
Source: ML conference proceedings conference paper supplement (https://proceedings.neurips.cc/paper_files/paper/2022/hash/7da6005a8d6942e8b328357da2872aed-Abstract.html)
Supplement: Supplementary file 1 [file 7da6005a8d6942e8b328357da2872aed-Supplemental-Conference.zip › codes/modular-rl/src/environments/unimal/envs/wrappers/multi_env_wrapper.py]

"""A wrapper env that handles multiple tasks from different envs."""

import os
import random

import gym
import numpy as np
from gym import spaces
from gym import utils

from environments.unimal.config import cfg
from environments.unimal.envs.modules.agent import create_agent_xml
from environments.unimal.envs.tasks.unimal import UnimalEnv
from environments.unimal.utils import file as fu
from environments.unimal.utils import spaces as spu


class MultiEnvWrapper(utils.EzPickle):
    def __init__(self, env, env_idx):
        # Identify the idx of the env within N subproc envs
        self.multi_env_idx = env_idx
        self._env = env
        self._active_unimal_idx = None
        self._unimal_seq = None
        self._unimal_seq_idx = -1
        self.num_steps = 0

    def __getattr__(self, name):
        return getattr(self._env, name)

    def reset(self):
        if self.num_steps == 0:
            self._unimal_seq = self._get_unimal_seq()
            self._unimal_seq_idx = -1

        self._unimal_seq_idx += 1
        self._active_unimal_idx = self._unimal_seq[self._unimal_seq_idx]
        unimal_id = cfg.ENV.WALKERS[self._active_unimal_idx]
        self._env.update(unimal_id, self._active_unimal_idx)
        obs = self._env.reset()

        return obs

    def step(self, action):
        self.num_steps += 1
        if self.num_steps % cfg.PPO.TIMESTEPS == 0:
            self._unimal_seq = self._get_unimal_seq()
            self._unimal_seq_idx = -1

        return self._env.step(action)

    def close(self):
        self._env.close()

    def _get_unimal_seq(self):
        path = os.path.join(cfg.OUT_DIR, "sampling.json")
        env_seq = fu.load_json(path)
        chunks = fu.chunkify(env_seq, cfg.PPO.NUM_ENVS)
        return chunks[self.multi_env_idx]


class MultiUnimalNodeCentricObservation(gym.ObservationWrapper):
    def __init__(self, env):
        super().__init__(env)

        self.max_limbs = cfg.MODEL.MAX_LIMBS
        self.max_joints = cfg.MODEL.MAX_JOINTS

        self.limb_obs_size = (
            self.observation_space["proprioceptive"].shape[0]
            // self.metadata["num_limbs"]
        )

        self._create_padding_mask()

        delta_obs = {
            "proprioceptive": (self.limb_obs_size * cfg.MODEL.MAX_LIMBS,),
            "edges": (2 * cfg.MODEL.MAX_JOINTS,),
            "obs_padding_mask": (self.obs_padding_mask.size,),
            "obs_padding_cm_mask": (self.obs_padding_cm_mask.size,),
            "act_padding_mask": (self.act_padding_mask.size,),
        }
        self.observation_space = spu.update_obs_space(env, delta_obs)

    def _create_padding_mask(self):
        num_limbs = self.metadata["num_limbs"]
        self.num_limb_pads = self.max_limbs - num_limbs

        # Create src_key_padding_mask for transformer
        obs_padding_mask = [False] * num_limbs + [True] * self.num_limb_pads

        self.obs_padding_mask = np.asarray(obs_padding_mask)
        # Create src_key_padding_mask for cross-modal transformer
        obs_padding_mask = [False] * (num_limbs + 1) + [True] * self.num_limb_pads
        self.obs_padding_cm_mask = np.asarray(obs_padding_mask)

        num_joints = self.metadata["num_joints"]
        self.num_joint_pads = self.max_joints - num_joints

        act_mask = self.metadata["joint_mask_for_node_graph"]
        act_padding_mask = [not _ for _ in act_mask] + [True] * self.num_limb_pads * 2

        if cfg.MIRROR_DATA_AUG:
            self.metadata["act_m_to_o"] = (
                self.metadata["m_to_o"] + [self.max_limbs - 1] * self.num_limb_pads
            )

        self.act_padding_mask = np.asarray(act_padding_mask)

        # Add to metadata, as used in MultiWalkerAction
        self.metadata["act_padding_mask"] = self.act_padding_mask

    def observation(self, obs):
        proprioceptive = obs["proprioceptive"]
        padding = [0.0] * (self.limb_obs_size * self.num_limb_pads)

        obs["proprioceptive"] = np.concatenate([proprioceptive, padding]).ravel()
        obs["obs_padding_mask"] = self.obs_padding_mask
        obs["obs_padding_cm_mask"] = self.obs_padding_cm_mask
        obs["act_padding_mask"] = self.act_padding_mask

        edges = obs["edges"]
        # Pad with edges which connect non-exsisten padded observations
        padding = [self.max_limbs - 1] * 2 * self.num_joint_pads
        obs["edges"] = np.concatenate([edges, padding]).ravel()
        return obs

    def _create_binary_encoding(self):
        agent_idx = self.metadata["agent_idx"]
        binary_encoding = bin(agent_idx)[2:].zfill(self.limb_obs_size)
        return [int(_) for _ in binary_encoding]

    def reset(self, **kwargs):
        observation = self.env.reset(**kwargs)
        self._create_padding_mask()
        return self.observation(observation)


class MultiUnimalNodeCentricAction(gym.ActionWrapper):
    def __init__(self, env):
        super().__init__(env)
        self._update_action_space()
        self.max_limbs = cfg.MODEL.MAX_LIMBS
        self.max_joints = cfg.MODEL.MAX_JOINTS

    def _update_action_space(self):
        num_joints = self.metadata["num_joints"]
        num_pads = self.max_limbs * 2 - num_joints
        low, high = self.action_space.low, self.action_space.high
        low = np.concatenate([low, [-1] * num_pads]).astype(np.float32)
        high = np.concatenate([high, [-1] * num_pads]).astype(np.float32)
        self.action_space = spaces.Box(low=low, high=high, dtype=np.float32)

    def action(self, action):
        if (cfg.MIRROR_DATA_AUG and self.metadata["mirrored"]):
            action = action.reshape(-1, 2)
            action = action[self.metadata["act_m_to_o"], :].reshape(-1)

        new_action = action[~self.metadata["act_padding_mask"]]
        return new_action
