# Supplementary material
Source: ML conference proceedings conference paper supplement (https://proceedings.neurips.cc/paper_files/paper/2022/hash/7da6005a8d6942e8b328357da2872aed-Abstract.html)
Supplement: Supplementary file 1 [file 7da6005a8d6942e8b328357da2872aed-Supplemental-Conference.zip › codes/modular-rl/src/environments/unimal/modular/metadata/floor-5506-11-8-01-12-33-50.json]

{
  "symmetric_limbs": [
    [
      0,
      1
    ],
    [
      4,
      5
    ],
    [
      6,
      7
    ]
  ],
  "dof": 10,
  "num_limbs": 7
}
