# Supplementary material
Source: ML conference proceedings conference paper supplement (https://proceedings.neurips.cc/paper_files/paper/2022/hash/7da6005a8d6942e8b328357da2872aed-Abstract.html)
Supplement: Supplementary file 1 [file 7da6005a8d6942e8b328357da2872aed-Supplemental-Conference.zip › codes/modular-rl/src/environments/unimal/utils/spaces.py]

from collections import OrderedDict

import numpy as np
from gym import spaces
from gym.spaces import Box
from gym.spaces import Dict


def update_obs_space(env, delta):
    spaces = env.observation_space.spaces.copy()
    for key, shape in delta.items():
        inf = np.float32(np.inf)
        spaces[key] = Box(-inf, inf, shape, np.float32)
    return Dict(spaces)


def convert_obs_to_space(observation):
    if isinstance(observation, dict):
        space = spaces.Dict(
            OrderedDict(
                [
                    (key, convert_obs_to_space(value))
                    for key, value in observation.items()
                ]
            )
        )
    elif isinstance(observation, np.ndarray):
        low = np.full(observation.shape, -float("inf"), dtype=np.float32)
        high = np.full(observation.shape, float("inf"), dtype=np.float32)
        space = spaces.Box(low, high, dtype=observation.dtype)
    else:
        raise NotImplementedError(type(observation), observation)

    return space
