# Supplementary material
Source: ML conference proceedings conference paper supplement (https://proceedings.neurips.cc/paper_files/paper/2022/hash/7da6005a8d6942e8b328357da2872aed-Abstract.html)
Supplement: Supplementary file 1 [file 7da6005a8d6942e8b328357da2872aed-Supplemental-Conference.zip › codes/modular-rl/src/environments/unimal/yacs.py]

# Copyright (c) 2018-present, Facebook, Inc.
#
# Licensed under the Apache License, Version 2.0 (the "License");
# you may not use this file except in compliance with the License.
# You may obtain a copy of the License at
#
#     http://www.apache.org/licenses/LICENSE-2.0
#
# Unless required by applicable law or agreed to in writing, software
# distributed under the License is distributed on an "AS IS" BASIS,
# WITHOUT WARRANTIES OR CONDITIONS OF ANY KIND, either express or implied.
# See the License for the specific language governing permissions and
# limitations under the License.
##############################################################################

"""YACS -- Yet Another Configuration System is designed to be a simple
configuration management system for academic and industrial research
projects.

See README.md for usage and examples.
"""

import copy
import io
import logging
import os
import sys
from ast import literal_eval

import yaml

# Flag for py2 and py3 compatibility to use when separate code paths are necessary
# When _PY2 is False, we assume Python 3 is in use
_PY2 = sys.version_info.major == 2

# Filename extensions for loading configs from files
_YAML_EXTS = {"", ".yaml", ".yml"}
_PY_EXTS = {".py"}

# py2 and py3 compatibility for checking file object type
# We simply use this to infer py2 vs py3
if _PY2:
    _FILE_TYPES = (file, io.IOBase)
else:
    _FILE_TYPES = (io.IOBase,)

# CfgNodes can only contain a limited set of valid types
_VALID_TYPES = {tuple, list, str, int, float, bool, type(None)}
# py2 allow for str and unicode
if _PY2:
    _VALID_TYPES = _VALID_TYPES.union({unicode})  # noqa: F821

# Utilities for importing modules from file paths
if _PY2:
    # imp is available in both py2 and py3 for now, but is deprecated in py3
    import imp
else:
    import importlib.util

logger = logging.getLogger(__name__)


class CfgNode(dict):
    """
    CfgNode represents an internal node in the configuration tree. It's a simple
    dict-like container that allows for attribute-based access to keys.
    """

    IMMUTABLE = "__immutable__"
    DEPRECATED_KEYS = "__deprecated_keys__"
    RENAMED_KEYS = "__renamed_keys__"
    NEW_ALLOWED = "__new_allowed__"

    def __init__(self, init_dict=None, key_list=None, new_allowed=False):
        """
        Args:
            init_dict (dict): the possibly-nested dictionary to initailize the CfgNode.
            key_list (list[str]): a list of names which index this CfgNode from the root.
                Currently only used for logging purposes.
            new_allowed (bool): whether adding new key is allowed when merging with
                other configs.
        """
        # Recursively convert nested dictionaries in init_dict into CfgNodes
        init_dict = {} if init_dict is None else init_dict
        key_list = [] if key_list is None else key_list
        init_dict = self._create_config_tree_from_dict(init_dict, key_list)
        super(CfgNode, self).__init__(init_dict)
        # Manage if the CfgNode is frozen or not
        self.__dict__[CfgNode.IMMUTABLE] = False
        # Deprecated options
        # If an option is removed from the code and you don't want to break existing
        # yaml configs, you can add the full config key as a string to the set below.
        self.__dict__[CfgNode.DEPRECATED_KEYS] = set()
        # Renamed options
        # If you rename a config option, record the mapping from the old name to the new
        # name in the dictionary below. Optionally, if the type also changed, you can
        # make the value a tuple that specifies first the renamed key and then
        # instructions for how to edit the config file.
        self.__dict__[CfgNode.RENAMED_KEYS] = {
            # 'EXAMPLE.OLD.KEY': 'EXAMPLE.NEW.KEY',  # Dummy example to follow
            # 'EXAMPLE.OLD.KEY': (                   # A more complex example to follow
            #     'EXAMPLE.NEW.KEY',
            #     "Also convert to a tuple, e.g., 'foo' -> ('foo',) or "
            #     + "'foo:bar' -> ('foo', 'bar')"
            # ),
        }

        # Allow new attributes after initialisation
        self.__dict__[CfgNode.NEW_ALLOWED] = new_allowed

    @classmethod
    def _create_config_tree_from_dict(cls, dic, key_list):
        """
        Create a configuration tree using the given dict.
        Any dict-like objects inside dict will be treated as a new CfgNode.

        Args:
            dic (dict):
            key_list (list[str]): a list of names which index this CfgNode from the root.
                Currently only used for logging purposes.
        """
        dic = copy.deepcopy(dic)
        for k, v in dic.items():
            if isinstance(v, dict):
                # Convert dict to CfgNode
                dic[k] = cls(v, key_list=key_list + [k])
            else:
                # Check for valid leaf type or nested CfgNode
                _assert_with_logging(
                    _valid_type(v, allow_cfg_node=False),
                    "Key {} with value {} is not a valid type; valid types: {}".format(
                        ".".join(key_list + [str(k)]), type(v), _VALID_TYPES
                    ),
                )
        return dic

    def __getattr__(self, name):
        if name in self:
            return self[name]
        else:
            raise AttributeError(name)

    def __setattr__(self, name, value):
        if self.is_frozen():
            raise AttributeError(
                "Attempted to set {} to {}, but CfgNode is immutable".format(
                    name, value
                )
            )

        _assert_with_logging(
            name not in self.__dict__,
            "Invalid attempt to modify internal CfgNode state: {}".format(name),
        )
        _assert_with_logging(
            _valid_type(value, allow_cfg_node=True),
            "Invalid type {} for key {}; valid types = {}".format(
                type(value), name, _VALID_TYPES
            ),
        )

        self[name] = value

    def __str__(self):
        def _indent(s_, num_spaces):
            s = s_.split("\n")
            if len(s) == 1:
                return s_
            first = s.pop(0)
            s = [(num_spaces * " ") + line for line in s]
            s = "\n".join(s)
            s = first + "\n" + s
            return s

        r = ""
        s = []
        for k, v in sorted(self.items()):
            seperator = "\n" if isinstance(v, CfgNode) else " "
            attr_str = "{}:{}{}".format(str(k), seperator, str(v))
            attr_str = _indent(attr_str, 2)
            s.append(attr_str)
        r += "\n".join(s)
        return r

    def __repr__(self):
        return "{}({})".format(self.__class__.__name__, super(CfgNode, self).__repr__())

    def dump(self, **kwargs):
        """Dump to a string."""

        def convert_to_dict(cfg_node, key_list):
            if not isinstance(cfg_node, CfgNode):
                _assert_with_logging(
                    _valid_type(cfg_node),
                    "Key {} with value {} is not a valid type; valid types: {}".format(
                        ".".join(key_list), type(cfg_node), _VALID_TYPES
                    ),
                )
                return cfg_node
            else:
                cfg_dict = dict(cfg_node)
                for k, v in cfg_dict.items():
                    cfg_dict[k] = convert_to_dict(v, key_list + [k])
                return cfg_dict

        self_as_dict = convert_to_dict(self, [])
        return yaml.safe_dump(self_as_dict, **kwargs)

    def merge_from_file(self, cfg_filename):
        """Load a yaml config file and merge it this CfgNode."""
        with open(cfg_filename, "r") as f:
            cfg = self.load_cfg(f)
        self.merge_from_other_cfg(cfg)

    def merge_from_other_cfg(self, cfg_other):
        """Merge `cfg_other` into this CfgNode."""
        _merge_a_into_b(cfg_other, self, self, [])

    def merge_from_list(self, cfg_list):
        """Merge config (keys, values) in a list (e.g., from command line) into
        this CfgNode. For example, `cfg_list = ['FOO.BAR', 0.5]`.
        """
        _assert_with_logging(
            len(cfg_list) % 2 == 0,
            "Override list has odd length: {}; it must be a list of pairs".format(
                cfg_list
            ),
        )
        root = self
        for full_key, v in zip(cfg_list[0::2], cfg_list[1::2]):
            if root.key_is_deprecated(full_key):
                continue
            if root.key_is_renamed(full_key):
                root.raise_key_rename_error(full_key)
            key_list = full_key.split(".")
            d = self
            for subkey in key_list[:-1]:
                _assert_with_logging(
                    subkey in d, "Non-existent key: {}".format(full_key)
                )
                d = d[subkey]
            subkey = key_list[-1]
            _assert_with_logging(subkey in d, "Non-existent key: {}".format(full_key))
            value = self._decode_cfg_value(v)
            value = _check_and_coerce_cfg_value_type(value, d[subkey], subkey, full_key)
            d[subkey] = value

    def freeze(self):
        """Make this CfgNode and all of its children immutable."""
        self._immutable(True)

    def defrost(self):
        """Make this CfgNode and all of its children mutable."""
        self._immutable(False)

    def is_frozen(self):
        """Return mutability."""
        return self.__dict__[CfgNode.IMMUTABLE]

    def _immutable(self, is_immutable):
        """Set immutability to is_immutable and recursively apply the setting
        to all nested CfgNodes.
        """
        self.__dict__[CfgNode.IMMUTABLE] = is_immutable
        # Recursively set immutable state
        for v in self.__dict__.values():
            if isinstance(v, CfgNode):
                v._immutable(is_immutable)
        for v in self.values():
            if isinstance(v, CfgNode):
                v._immutable(is_immutable)

    def clone(self):
        """Recursively copy this CfgNode."""
        return copy.deepcopy(self)

    def register_deprecated_key(self, key):
        """Register key (e.g. `FOO.BAR`) a deprecated option. When merging deprecated
        keys a warning is generated and the key is ignored.
        """
        _assert_with_logging(
            key not in self.__dict__[CfgNode.DEPRECATED_KEYS],
            "key {} is already registered as a deprecated key".format(key),
        )
        self.__dict__[CfgNode.DEPRECATED_KEYS].add(key)

    def register_renamed_key(self, old_name, new_name, message=None):
        """Register a key as having been renamed from `old_name` to `new_name`.
        When merging a renamed key, an exception is thrown alerting to user to
        the fact that the key has been renamed.
        """
        _assert_with_logging(
            old_name not in self.__dict__[CfgNode.RENAMED_KEYS],
            "key {} is already registered as a renamed cfg key".format(old_name),
        )
        value = new_name
        if message:
            value = (new_name, message)
        self.__dict__[CfgNode.RENAMED_KEYS][old_name] = value

    def key_is_deprecated(self, full_key):
        """Test if a key is deprecated."""
        if full_key in self.__dict__[CfgNode.DEPRECATED_KEYS]:
            logger.warning("Deprecated config key (ignoring): {}".format(full_key))
            return True
        return False

    def key_is_renamed(self, full_key):
        """Test if a key is renamed."""
        return full_key in self.__dict__[CfgNode.RENAMED_KEYS]

    def raise_key_rename_error(self, full_key):
        new_key = self.__dict__[CfgNode.RENAMED_KEYS][full_key]
        if isinstance(new_key, tuple):
            msg = " Note: " + new_key[1]
            new_key = new_key[0]
        else:
            msg = ""
        raise KeyError(
            "Key {} was renamed to {}; please update your config.{}".format(
                full_key, new_key, msg
            )
        )

    def is_new_allowed(self):
        return self.__dict__[CfgNode.NEW_ALLOWED]

    @classmethod
    def load_cfg(cls, cfg_file_obj_or_str):
        """
        Load a cfg.
        Args:
            cfg_file_obj_or_str (str or file):
                Supports loading from:
                - A file object backed by a YAML file
                - A file object backed by a Python source file that exports an attribute
                  "cfg" that is either a dict or a CfgNode
                - A string that can be parsed as valid YAML
        """
        _assert_with_logging(
            isinstance(cfg_file_obj_or_str, _FILE_TYPES + (str,)),
            "Expected first argument to be of type {} or {}, but it was {}".format(
                _FILE_TYPES, str, type(cfg_file_obj_or_str)
            ),
        )
        if isinstance(cfg_file_obj_or_str, str):
            return cls._load_cfg_from_yaml_str(cfg_file_obj_or_str)
        elif isinstance(cfg_file_obj_or_str, _FILE_TYPES):
            return cls._load_cfg_from_file(cfg_file_obj_or_str)
        else:
            raise NotImplementedError("Impossible to reach here (unless there's a bug)")

    @classmethod
    def _load_cfg_from_file(cls, file_obj):
        """Load a config from a YAML file or a Python source file."""
        _, file_extension = os.path.splitext(file_obj.name)
        if file_extension in _YAML_EXTS:
            return cls._load_cfg_from_yaml_str(file_obj.read())
        elif file_extension in _PY_EXTS:
            return cls._load_cfg_py_source(file_obj.name)
        else:
            raise Exception(
                "Attempt to load from an unsupported file type {}; "
                "only {} are supported".format(file_obj, _YAML_EXTS.union(_PY_EXTS))
            )

    @classmethod
    def _load_cfg_from_yaml_str(cls, str_obj):
        """Load a config from a YAML string encoding."""
        cfg_as_dict = yaml.safe_load(str_obj)
        return cls(cfg_as_dict)

    @classmethod
    def _load_cfg_py_source(cls, filename):
        """Load a config from a Python source file."""
        module = _load_module_from_file("yacs.config.override", filename)
        _assert_with_logging(
            hasattr(module, "cfg"),
            "Python module from file {} must have 'cfg' attr".format(filename),
        )
        VALID_ATTR_TYPES = {dict, CfgNode}
        _assert_with_logging(
            type(module.cfg) in VALID_ATTR_TYPES,
            "Imported module 'cfg' attr must be in {} but is {} instead".format(
                VALID_ATTR_TYPES, type(module.cfg)
            ),
        )
        return cls(module.cfg)

    @classmethod
    def _decode_cfg_value(cls, value):
        """
        Decodes a raw config value (e.g., from a yaml config files or command
        line argument) into a Python object.

        If the value is a dict, it will be interpreted as a new CfgNode.
        If the value is a str, it will be evaluated as literals.
        Otherwise it is returned as-is.
        """
        # Configs parsed from raw yaml will contain dictionary keys that need to be
        # converted to CfgNode objects
        if isinstance(value, dict):
            return cls(value)
        # All remaining processing is only applied to strings
        if not isinstance(value, str):
            return value
        # Try to interpret `value` as a:
        #   string, number, tuple, list, dict, boolean, or None
        try:
            value = literal_eval(value)
        # The following two excepts allow v to pass through when it represents a
        # string.
        #
        # Longer explanation:
        # The type of v is always a string (before calling literal_eval), but
        # sometimes it *represents* a string and other times a data structure, like
        # a list. In the case that v represents a string, what we got back from the
        # yaml parser is 'foo' *without quotes* (so, not '"foo"'). literal_eval is
        # ok with '"foo"', but will raise a ValueError if given 'foo'. In other
        # cases, like paths (v = 'foo/bar' and not v = '"foo/bar"'), literal_eval
        # will raise a SyntaxError.
        except ValueError:
            pass
        except SyntaxError:
            pass
        return value


load_cfg = (
    CfgNode.load_cfg
)  # keep this function in global scope for backward compatibility


def _valid_type(value, allow_cfg_node=False):
    return (type(value) in _VALID_TYPES) or (
        allow_cfg_node and isinstance(value, CfgNode)
    )


def _merge_a_into_b(a, b, root, key_list):
    """Merge config dictionary a into config dictionary b, clobbering the
    options in b whenever they are also specified in a.
    """
    _assert_with_logging(
        isinstance(a, CfgNode),
        "`a` (cur type {}) must be an instance of {}".format(type(a), CfgNode),
    )
    _assert_with_logging(
        isinstance(b, CfgNode),
        "`b` (cur type {}) must be an instance of {}".format(type(b), CfgNode),
    )

    for k, v_ in a.items():
        full_key = ".".join(key_list + [k])

        v = copy.deepcopy(v_)
        v = b._decode_cfg_value(v)

        if k in b:
            v = _check_and_coerce_cfg_value_type(v, b[k], k, full_key)
            # Recursively merge dicts
            if isinstance(v, CfgNode):
                try:
                    _merge_a_into_b(v, b[k], root, key_list + [k])
                except BaseException:
                    raise
            else:
                b[k] = v
        elif b.is_new_allowed():
            b[k] = v
        else:
            if root.key_is_deprecated(full_key):
                continue
            elif root.key_is_renamed(full_key):
                root.raise_key_rename_error(full_key)
            else:
                # continue
                raise KeyError("Non-existent config key: {}".format(full_key))


def _check_and_coerce_cfg_value_type(replacement, original, key, full_key):
    """Checks that `replacement`, which is intended to replace `original` is of
    the right type. The type is correct if it matches exactly or is one of a few
    cases in which the type can be easily coerced.
    """
    original_type = type(original)
    replacement_type = type(replacement)

    # The types must match (with some exceptions)
    if replacement_type == original_type:
        return replacement

    # If either of them is None, allow type conversion to one of the valid types
    if (replacement_type == type(None) and original_type in _VALID_TYPES) or (
        original_type == type(None) and replacement_type in _VALID_TYPES
    ):
        return replacement

    # Cast replacement from from_type to to_type if the replacement and original
    # types match from_type and to_type
    def conditional_cast(from_type, to_type):
        if replacement_type == from_type and original_type == to_type:
            return True, to_type(replacement)
        else:
            return False, None

    # Conditionally casts
    # list <-> tuple
    casts = [(tuple, list), (list, tuple)]
    # For py2: allow converting from str (bytes) to a unicode string
    try:
        casts.append((str, unicode))  # noqa: F821
    except Exception:
        pass

    for (from_type, to_type) in casts:
        converted, converted_value = conditional_cast(from_type, to_type)
        if converted:
            return converted_value

    raise ValueError(
        "Type mismatch ({} vs. {}) with values ({} vs. {}) for config "
        "key: {}".format(
            original_type, replacement_type, original, replacement, full_key
        )
    )


def _assert_with_logging(cond, msg):
    if not cond:
        logger.debug(msg)
    assert cond, msg


def _load_module_from_file(name, filename):
    if _PY2:
        module = imp.load_source(name, filename)
    else:
        spec = importlib.util.spec_from_file_location(name, filename)
        module = importlib.util.module_from_spec(spec)
        spec.loader.exec_module(module)
    return module
