# Supplementary material
Source: ML conference proceedings conference paper supplement (https://proceedings.neurips.cc/paper_files/paper/2022/hash/7da6005a8d6942e8b328357da2872aed-Abstract.html)
Supplement: Supplementary file 1 [file 7da6005a8d6942e8b328357da2872aed-Supplemental-Conference.zip › codes/modular-rl/src/environments/unimalC/floor-1409-3-17-01-11-13-22.xml]

<?xml version='1.0' encoding='UTF-8'?>
<!-- Universal Animal Template: unimal -->
<mujoco model="unimal">
  <compiler angle="degree"/>
  <size njmax="2000" nconmax="500"/>
  <option timestep=".005">
    <flag filterparent="disable"/>
  </option>
  <!-- Common defaults to make search space tractable -->
  <default>
    <!-- Define motor defaults -->
    <motor ctrlrange="-1 1" ctrllimited="true"/>
    <!-- Define joint defaults -->
    <default class="normal_joint">
      <joint type="hinge" damping="1" stiffness="1" armature="1" limited="true" range="-120 120" solimplimit="0 0.99 0.01"/>
    </default>
    <default class="walker_joint">
      <joint type="hinge" damping="0.2" stiffness="1" armature=".01" limited="true" range="-120 120" solimplimit="0 0.99 0.01"/>
    </default>
    <default class="stiff_joint">
      <joint type="hinge" damping="5" stiffness="10" armature=".01" limited="true" solimplimit="0 0.99 0.01"/>
    </default>
    <default class="free">
      <joint limited="false" damping="0" armature="0" stiffness="0"/>
    </default>
    <default class="growth_site">
      <site size="1e-6 1e-6 1e-6"/>
    </default>
    <default class="torso_growth_site">
      <site size="1e-6 1e-6 1e-6"/>
    </default>
    <default class="mirror_growth_site">
      <site size="1e-6 1e-6 1e-6"/>
    </default>
    <default class="btm_pos_site">
      <site size="1e-6 1e-6 1e-6"/>
    </default>
    <default class="box_face_site">
      <site size="1e-6 1e-6 1e-6"/>
    </default>
    <default class="imu_vel">
      <site type="box" size="0.05" rgba="1 0 0 1"/>
    </default>
    <default class="touch_site">
      <site group="3" rgba="0 0 1 .3"/>
    </default>
    <default class="food_site">
      <site material="food" size="0.15"/>
    </default>
    <!-- Define geom defaults -->
    <geom type="capsule" condim="3" friction="0.7 0.1 0.1" material="self"/>
  </default>
  <worldbody>
    <light diffuse="1 1 1" directional="true" exponent="1" pos="0 0 1" specular=".1 .1 .1"/>
    <!-- <geom name="floor" type="plane" pos="0 0 0" size="50 50 1" material="grid"/> -->
    <!-- Programatically generated xml goes here -->
    <body name="torso/0" pos="0 0 1.03">
      <joint name="root" type="free" class="free"/>
      <site name="root" class="imu_vel"/>
      <geom name="torso/0" type="sphere" size="0.1" condim="3" density="1000"/>
      <camera name="side" pos="0 -7 2" xyaxes="1 0 0 0 1 2" mode="trackcom"/>
      <site name="torso/0" class="growth_site" pos="0 0 0"/>
      <site name="torso/btm_pos/0" class="btm_pos_site" pos="0 0 -0.1"/>
      <site name="torso/touch/0" class="touch_site" size="0.11"/>
      <site name="torso/horizontal_y/0" class="torso_growth_site" pos="-0.1 0 0"/>
      <body name="limb/0" pos="0.1 0.0 0.0">
        <joint name="limbx/0" type="hinge" class="normal_joint" range="-60 0" pos="-0.05 0.0 0.0" axis="0.0 0.0 1.0"/>
        <joint name="limby/0" type="hinge" class="normal_joint" range="0 90" pos="-0.05 0.0 0.0" axis="-0.0 1.0 0.0"/>
        <geom name="limb/0" type="capsule" fromto="0.0 0.0 0.0 0.25 0.0 0.0" size="0.05" density="1000"/>
        <site name="limb/mid/0" class="growth_site" pos="0.15 0.0 0.0"/>
        <site name="limb/btm/0" class="growth_site" pos="0.25 0.0 0.0"/>
        <site name="limb/btm_pos/0" class="btm_pos_site" pos="0.25 0.0 0.0"/>
        <site name="limb/touch/0" class="touch_site" size="0.060000000000000005" fromto="0.0 0.0 0.0 0.25 0.0 0.0" type="capsule"/>
        <body name="limb/15" pos="0.25 0.0 -0.05">
          <joint name="limby/15" type="hinge" class="normal_joint" range="-30 60" pos="0.0 0.0 0.05" axis="0.0 1.0 0.0"/>
          <geom name="limb/15" type="capsule" fromto="0.0 0.0 0.0 0.0 0.0 -0.45" size="0.05" density="1000"/>
          <site name="limb/mid/15" class="growth_site" pos="0.0 0.0 -0.25"/>
          <site name="limb/btm/15" class="growth_site" pos="0.0 0.0 -0.45"/>
          <site name="limb/btm_pos/15" class="btm_pos_site" pos="0.0 0.0 -0.5"/>
          <site name="limb/touch/15" class="touch_site" size="0.060000000000000005" fromto="0.0 0.0 0.0 0.0 0.0 -0.45" type="capsule"/>
        </body>
      </body>
      <body name="limb/10" pos="-0.07 0.0 -0.07">
        <joint name="limby/10" type="hinge" class="normal_joint" range="-45 0" pos="0.04 0.0 0.04" axis="0.0 1.0 0.0"/>
        <geom name="limb/10" type="capsule" fromto="0.0 0.0 0.0 -0.25 0.0 -0.25" size="0.05" density="1000"/>
        <site name="limb/mid/10" class="growth_site" pos="-0.14 0.0 -0.14"/>
        <site name="limb/btm/10" class="growth_site" pos="-0.25 0.0 -0.25"/>
        <site name="limb/btm_pos/10" class="btm_pos_site" pos="-0.25 0.0 -0.25"/>
        <site name="limb/touch/10" class="touch_site" size="0.060000000000000005" fromto="0.0 0.0 0.0 -0.25 0.0 -0.25" type="capsule"/>
        <body name="limb/12" pos="-0.14 0.0 -0.19">
          <joint name="limby/12" type="hinge" class="normal_joint" range="0 45" pos="0.0 0.0 0.05" axis="0.0 1.0 0.0"/>
          <geom name="limb/12" type="capsule" fromto="0.0 0.0 0.0 0.0 0.0 -0.25" size="0.05" density="1000"/>
          <site name="limb/mid/12" class="growth_site" pos="0.0 0.0 -0.15"/>
          <site name="limb/btm/12" class="growth_site" pos="0.0 0.0 -0.25"/>
          <site name="limb/btm_pos/12" class="btm_pos_site" pos="0.0 0.0 -0.25"/>
          <site name="limb/touch/12" class="touch_site" size="0.060000000000000005" fromto="0.0 0.0 0.0 0.0 0.0 -0.25" type="capsule"/>
          <body name="limb/13" pos="0.0 0.05 -0.25">
            <joint name="limbx/13" type="hinge" class="normal_joint" range="-30 60" pos="0.0 -0.05 0.0" axis="1.0 0.0 0.0"/>
            <joint name="limby/13" type="hinge" class="normal_joint" range="0 60" pos="0.0 -0.05 0.0" axis="0.0 0.0 1.0"/>
            <geom name="limb/13" type="capsule" fromto="0.0 0.0 0.0 0.0 0.35 0.0" size="0.05" density="1000"/>
            <site name="limb/mid/13" class="mirror_growth_site" pos="0.0 0.2 0.0"/>
            <site name="limb/btm/13" class="mirror_growth_site" pos="0.0 0.35 0.0"/>
            <site name="limb/btm_pos/13" class="btm_pos_site" pos="0.0 0.4 0.0"/>
            <site name="limb/touch/13" class="touch_site" size="0.060000000000000005" fromto="0.0 0.0 0.0 0.0 0.35 0.0" type="capsule"/>
            <body name="limb/16" pos="-0.05 0.35 0.0">
              <joint name="limby/16" type="hinge" class="normal_joint" range="-60 30" pos="0.05 0.0 0.0" axis="0.0 1.0 0.0"/>
              <geom name="limb/16" type="capsule" fromto="0.0 0.0 0.0 -0.45 0.0 0.0" size="0.05" density="1000"/>
              <site name="limb/mid/16" class="mirror_growth_site" pos="-0.25 0.0 0.0"/>
              <site name="limb/btm/16" class="mirror_growth_site" pos="-0.45 0.0 0.0"/>
              <site name="limb/btm_pos/16" class="btm_pos_site" pos="-0.5 0.0 0.0"/>
              <site name="limb/touch/16" class="touch_site" size="0.060000000000000005" fromto="0.0 0.0 0.0 -0.45 0.0 0.0" type="capsule"/>
              <body name="limb/18" pos="-0.29 0.0 -0.04">
                <joint name="limbx/18" type="hinge" class="normal_joint" range="-60 30" pos="0.04 0.0 0.04" axis="0.7071 0.0 -0.7071"/>
                <geom name="limb/18" type="capsule" fromto="0.0 0.0 0.0 -0.25 0.0 -0.25" size="0.05" density="1000"/>
                <site name="limb/mid/18" class="mirror_growth_site" pos="-0.14 0.0 -0.14"/>
                <site name="limb/btm/18" class="mirror_growth_site" pos="-0.25 0.0 -0.25"/>
                <site name="limb/btm_pos/18" class="btm_pos_site" pos="-0.28 0.0 -0.28"/>
                <site name="limb/touch/18" class="touch_site" size="0.060000000000000005" fromto="0.0 0.0 0.0 -0.25 0.0 -0.25" type="capsule"/>
              </body>
            </body>
          </body>
          <body name="limb/14" pos="0.0 -0.05 -0.25">
            <joint name="limbx/14" type="hinge" class="normal_joint" range="-30 60" pos="0.0 0.05 0.0" axis="1.0 0.0 -0.0"/>
            <joint name="limby/14" type="hinge" class="normal_joint" range="0 60" pos="0.0 0.05 0.0" axis="-0.0 0.0 -1.0"/>
            <geom name="limb/14" type="capsule" fromto="0.0 0.0 0.0 0.0 -0.35 0.0" size="0.05" density="1000"/>
            <site name="limb/mid/14" class="mirror_growth_site" pos="0.0 -0.2 0.0"/>
            <site name="limb/btm/14" class="mirror_growth_site" pos="0.0 -0.35 0.0"/>
            <site name="limb/btm_pos/14" class="btm_pos_site" pos="0.0 -0.4 0.0"/>
            <site name="limb/touch/14" class="touch_site" size="0.060000000000000005" fromto="0.0 0.0 0.0 0.0 -0.35 0.0" type="capsule"/>
            <body name="limb/17" pos="-0.05 -0.35 0.0">
              <joint name="limby/17" type="hinge" class="normal_joint" range="-60 30" pos="0.05 0.0 0.0" axis="0.0 1.0 0.0"/>
              <geom name="limb/17" type="capsule" fromto="0.0 0.0 0.0 -0.45 0.0 0.0" size="0.05" density="1000"/>
              <site name="limb/mid/17" class="mirror_growth_site" pos="-0.25 0.0 0.0"/>
              <site name="limb/btm/17" class="mirror_growth_site" pos="-0.45 0.0 0.0"/>
              <site name="limb/btm_pos/17" class="btm_pos_site" pos="-0.5 0.0 0.0"/>
              <site name="limb/touch/17" class="touch_site" size="0.060000000000000005" fromto="0.0 0.0 0.0 -0.45 0.0 0.0" type="capsule"/>
              <body name="limb/19" pos="-0.29 0.0 -0.04">
                <joint name="limbx/19" type="hinge" class="normal_joint" range="-60 30" pos="0.04 0.0 0.04" axis="0.7071 0.0 -0.7071"/>
                <geom name="limb/19" type="capsule" fromto="0.0 0.0 0.0 -0.25 0.0 -0.25" size="0.05" density="1000"/>
                <site name="limb/mid/19" class="mirror_growth_site" pos="-0.14 0.0 -0.14"/>
                <site name="limb/btm/19" class="mirror_growth_site" pos="-0.25 0.0 -0.25"/>
                <site name="limb/btm_pos/19" class="btm_pos_site" pos="-0.28 0.0 -0.28"/>
                <site name="limb/touch/19" class="touch_site" size="0.060000000000000005" fromto="0.0 0.0 0.0 -0.25 0.0 -0.25" type="capsule"/>
              </body>
            </body>
          </body>
        </body>
      </body>
    </body>
  </worldbody>
  <actuator>
    <motor joint="limbx/0" gear="200" name="limbx/0"/>
    <motor joint="limby/0" gear="250" name="limby/0"/>
    <motor joint="limby/15" gear="250" name="limby/15"/>
    <motor joint="limby/10" gear="250" name="limby/10"/>
    <motor joint="limby/12" gear="250" name="limby/12"/>
    <motor joint="limbx/13" gear="150" name="limbx/13"/>
    <motor joint="limby/13" gear="150" name="limby/13"/>
    <motor joint="limby/16" gear="150" name="limby/16"/>
    <motor joint="limbx/18" gear="250" name="limbx/18"/>
    <motor joint="limbx/14" gear="150" name="limbx/14"/>
    <motor joint="limby/14" gear="150" name="limby/14"/>
    <motor joint="limby/17" gear="150" name="limby/17"/>
    <motor joint="limbx/19" gear="250" name="limbx/19"/>
  </actuator>
  <sensor>
    <accelerometer name="torso_accel" site="root"/>
    <gyro name="torso_gyro" site="root"/>
    <velocimeter name="torso_vel" site="root"/>
    <subtreeangmom name="unimal_am" body="torso/0"/>
    <touch name="torso/0" site="torso/touch/0"/>
    <touch name="limb/0" site="limb/touch/0"/>
    <touch name="limb/15" site="limb/touch/15"/>
    <touch name="limb/10" site="limb/touch/10"/>
    <touch name="limb/12" site="limb/touch/12"/>
    <touch name="limb/13" site="limb/touch/13"/>
    <touch name="limb/16" site="limb/touch/16"/>
    <touch name="limb/18" site="limb/touch/18"/>
    <touch name="limb/14" site="limb/touch/14"/>
    <touch name="limb/17" site="limb/touch/17"/>
    <touch name="limb/19" site="limb/touch/19"/>
  </sensor>
  <!-- Add hfield assets -->
  <asset/>
  <!-- List of contacts to exclude -->
  <contact>
    <exclude name="limb/13:limb/14" body1="limb/13" body2="limb/14"/>
  </contact>
  <!-- Define material, texture etc -->
  <asset>
    <material name="grid" texture="grid" texrepeat="1 1" texuniform="true" reflectance="0"/>
    <material name="hfield" texture="hfield" texrepeat="1 1" texuniform="true" reflectance="0"/>
    <material name="wall" texture="wall" texrepeat="1 1" texuniform="true" reflectance=".5"/>
    <material name="platform" texture="platform" texrepeat="1 1" texuniform="true" reflectance=".5"/>
    <material name="boundary" texture="boundary" texrepeat="1 1" texuniform="true" reflectance=".5"/>
    <material name="jump" texture="jump" texrepeat="1 1" texuniform="true" reflectance=".5"/>
    <material name="goal" rgba="1 0 0 1"/>
    <material name="food" rgba="0 0 1 1" emission="1"/>
    <material name="self" rgba=".7 .5 .3 1"/>
    <material name="self_default" rgba=".7 .5 .3 1"/>
    <material name="self_highlight" rgba="0 .5 .3 1"/>
    <material name="effector" rgba=".7 .4 .2 1"/>
    <material name="effector_default" rgba=".7 .4 .2 1"/>
    <material name="effector_highlight" rgba="0 .5 .3 1"/>
    <material name="decoration" rgba=".3 .5 .7 1"/>
    <material name="eye" rgba="0 .2 1 1"/>
    <material name="target" rgba=".6 .3 .3 1"/>
    <material name="target_default" rgba=".6 .3 .3 1"/>
    <material name="target_highlight" rgba=".6 .3 .3 .4"/>
    <material name="site" rgba=".5 .5 .5 .3"/>
    <material name="ball" texture="ball"/>
  </asset>
  <asset>
    <texture name="grid" type="2d" builtin="checker" rgb1="0.1 0.1 0.1" rgb2="0.1 0.1 0.1" width="300" height="300" mark="edge" markrgb="0.2 0.2 0.2"/>
    <texture name="hfield" type="2d" builtin="checker" rgb1="0.1 0.1 0.1" rgb2="0.1 0.1 0.1" width="300" height="300"/>
    <texture name="wall" type="2d" builtin="flat" rgb1="0.9 0.7 0" rgb2="0.9 0.7 0" width="300" height="300"/>
    <texture name="platform" type="2d" builtin="flat" rgb1="0.3 0 0.8" rgb2="0.3 0 0.8" width="300" height="300"/>
    <texture name="boundary" type="2d" builtin="flat" rgb1="0.3 0.3 0.3" rgb2="0.3 0.3 0.3" width="300" height="300"/>
    <texture name="jump" type="2d" builtin="flat" rgb1="0.3 0.3 0.3" rgb2="0.3 0.3 0.3" width="300" height="300"/>
    <texture name="skybox" type="skybox" builtin="flat" rgb1="0.8 1 1" rgb2="0.8 1 1" width="800" height="800"/>
    <texture name="ball" builtin="checker" mark="cross" width="151" height="151" rgb1="0.1 0.1 0.1" rgb2="0.9 0.9 0.9" markrgb="1 1 1"/>
  </asset>
  <visual>
    <headlight ambient=".4 .4 .4" diffuse=".8 .8 .8" specular="0.1 0.1 0.1"/>
    <map znear=".01"/>
    <quality shadowsize="2048"/>
  </visual>
</mujoco>
