# Supplementary material
Source: ML conference proceedings conference paper supplement (https://proceedings.neurips.cc/paper_files/paper/2022/hash/7da6005a8d6942e8b328357da2872aed-Abstract.html)
Supplement: Supplementary file 1 [file 7da6005a8d6942e8b328357da2872aed-Supplemental-Conference.zip › codes/modular-rl/src/environments/walker_humanoids_hopper/hopper_5.xml]

<mujoco model="hopper">
  <include file="../../misc/skybox.xml" />
  <include file="../../misc/visual.xml" />
  <include file="../../misc/materials.xml" />
  <compiler angle="degree" coordinate="global" inertiafromgeom="true"/>
  <default>
    <joint armature="1" damping="1" limited="true"/>
    <geom conaffinity="1" condim="1" contype="1" margin="0.001" material="self" solimp=".8 .8 .01" solref=".02 1"/>
    <motor ctrllimited="true" ctrlrange="-.4 .4"/>
  </default>
  <option integrator="RK4" timestep="0.002"/>
  <visual>
    <map znear="0.02"/>
  </visual>
  <worldbody>
    <light cutoff="100" diffuse="1 1 1" dir="-1 -0 -1.5" directional="true" exponent="1" pos="0 0 1.3" specular=".1 .1 .1"/>
    <geom conaffinity="1" condim="3" name="floor" pos="0 0 0" size="20 20 .125" type="plane" material="grid"/>
    <body name="torso" pos="0 0 1.75">
      <camera mode="trackcom" name="tilted" pos="2.7 3 1" xyaxes="1 -.9 0 0 0 -1" />
      <camera name="track" mode="trackcom" pos="0 3 1" xyaxes="1 0 0 0 0 -1"/>
      <joint armature="0" axis="1 0 0" damping="0" limited="false" name="rootx" pos="0 0 0" stiffness="0" type="slide"/>
      <joint armature="0" axis="0 0 1" damping="0" limited="false" name="rootz" pos="0 0 0" ref="1.75" stiffness="0" type="slide"/>
      <joint armature="0" axis="0 1 0" damping="0" limited="false" name="rooty" pos="0 0 1.75" stiffness="0" type="hinge"/>
      <geom friction="0.9" fromto="0 0 1.95 0 0 1.55" name="torso_geom" size="0.05" type="capsule"/>
      <body name="thigh" pos="0 0 1.55">
        <joint axis="0 -1 0" name="thigh_joint" pos="0 0 1.55" range="-150 0" type="hinge"/>
        <geom friction="0.9" fromto="0 0 1.55 0 0 1.1" name="thigh_geom" size="0.05" type="capsule"/>
        <body name="leg" pos="0 0 0.85">
          <joint axis="0 -1 0" name="leg_joint" pos="0 0 1.1" range="-150 0" type="hinge"/>
          <geom friction="0.9" fromto="0 0 1.1 0 0 0.6" name="leg_geom" size="0.04" type="capsule"/>
          <body name="lower_leg" pos="0 0 0.35">
            <joint axis="0 -1 0" name="lower_leg_joint" pos="0 0 0.6" range="-150 0" type="hinge"/>
            <geom friction="0.9" fromto="0 0 0.6 0 0 0.1" name="lower_leg_geom" size="0.04" type="capsule"/>
            <body name="foot" pos="0.13/2 0 0.1">
              <joint axis="0 -1 0" name="foot_joint" pos="0 0 0.1" range="-45 45" type="hinge"/>
              <geom friction="2.0" fromto="-0.13 0 0.1 0.26 0 0.1" name="foot_geom" size="0.06" type="capsule"/>
            </body>
          </body>
        </body>
      </body>
    </body>
  </worldbody>
  <actuator>
    <motor ctrllimited="true" ctrlrange="-1.0 1.0" gear="200.0" joint="thigh_joint"/>
    <motor ctrllimited="true" ctrlrange="-1.0 1.0" gear="200.0" joint="leg_joint"/>
    <motor ctrllimited="true" ctrlrange="-1.0 1.0" gear="200.0" joint="lower_leg_joint"/>
    <motor ctrllimited="true" ctrlrange="-1.0 1.0" gear="200.0" joint="foot_joint"/>
  </actuator>
</mujoco>
