# Supplementary material
Source: ML conference proceedings conference paper supplement (https://proceedings.neurips.cc/paper_files/paper/2022/hash/7da6005a8d6942e8b328357da2872aed-Abstract.html)
Supplement: Supplementary file 1 [file 7da6005a8d6942e8b328357da2872aed-Supplemental-Conference.zip › codes/modular-rl/src/misc/skybox.xml]

<mujoco>
  <asset>
      <texture name="skybox" type="skybox" builtin="gradient" rgb1=".4 .6 .8" rgb2="0 0 0"
               width="800" height="800" mark="random" markrgb="1 1 1"/>
  </asset>
</mujoco>
