# Supplementary material
Source: ML conference proceedings conference paper supplement (https://proceedings.neurips.cc/paper_files/paper/2022/hash/7da6005a8d6942e8b328357da2872aed-Abstract.html)
Supplement: Supplementary file 1 [file 7da6005a8d6942e8b328357da2872aed-Supplemental-Conference.zip › codes/modular-rl/src/misc/visual_white.xml]

<mujoco>
  <visual>
    <headlight ambient=".4 .4 .4" diffuse=".8 .8 .8" specular="0.1 0.1 0.1"/>
    <map znear=".01"/>
    <quality shadowsize="2048"/>
  </visual>
</mujoco>
