# Supplementary material
Source: ML conference proceedings conference paper supplement (https://proceedings.neurips.cc/paper_files/paper/2022/hash/7da6005a8d6942e8b328357da2872aed-Abstract.html)
Supplement: Supplementary file 1 [file 7da6005a8d6942e8b328357da2872aed-Supplemental-Conference.zip › codes/modular-rl/src/utils.py]

from __future__ import print_function

import os
from shutil import copyfile

import gym
import numpy as np
import torch.nn as nn
import torch.nn.functional as F
import xmltodict
from gym.envs.registration import register

import wrappers
from config import *


def makeEnvWrapper(env_name, obs_max_len=None, seed=0, unimal=False):
    """return wrapped gym environment for parallel sample collection (vectorized environments)"""

    def helper():
        e = gym.make("environments:%s-v0" % env_name)
        e.seed(seed)
        return wrappers.ModularEnvWrapper(e, obs_max_len, unimal=unimal)

    return helper


def findMaxChildren(env_names, graphs):
    """return the maximum number of children given a list of env names and their corresponding graph structures"""
    max_children = 0
    for name in env_names:
        most_frequent = max(graphs[name], key=graphs[name].count)
        max_children = max(max_children, graphs[name].count(most_frequent))
    return max_children


def registerEnvs(env_names, max_episode_steps, custom_xml):
    """register the MuJoCo envs with Gym and return the per-agent observation size and max action value (for modular policy training)"""
    # get all paths to xmls (handle the case where the given path is a directory containing multiple xml files)
    paths_to_register = []
    # existing envs
    if not custom_xml:
        for name in env_names:
            paths_to_register.append(os.path.join(XML_DIR, "{}.xml".format(name)))
    # custom envs
    else:
        if os.path.isfile(custom_xml):
            paths_to_register.append(custom_xml)
        elif os.path.isdir(custom_xml):
            for name in sorted(os.listdir(custom_xml)):
                if ".xml" in name:
                    paths_to_register.append(os.path.join(custom_xml, name))
    # register each env
    for xml in paths_to_register:
        env_name = os.path.basename(xml)[:-4]
        env_file = env_name
        # register with gym
        if 'unimal' in custom_xml:
            params = {"xml_path": os.path.abspath(xml),
                      "env_name": env_name, }
            register(
                id=("%s-v0" % env_name),
                max_episode_steps=max_episode_steps,
                entry_point="environments.unimal.envs.tasks.task:make_env",
                kwargs=params,
            )
            env = wrappers.IdentityWrapper(gym.make("environments:%s-v0" % env_name), unimal=True)
        else:
            # create a copy of modular environment for custom xml model
            if not os.path.exists(os.path.join(ENV_DIR, "{}.py".format(env_name))):
                # create a duplicate of gym environment file for each env (necessary for avoiding bug in gym)
                copyfile(
                    BASE_MODULAR_ENV_PATH, "{}.py".format(os.path.join(ENV_DIR, env_name))
                )
            params = {"xml": os.path.abspath(xml)}
            register(
                id=("%s-v0" % env_name),
                max_episode_steps=max_episode_steps,
                entry_point="environments.%s:ModularEnv" % env_file,
                kwargs=params,
            )
            env = wrappers.IdentityWrapper(gym.make("environments:%s-v0" % env_name))
        # the following is the same for each env
        agent_obs_size = env.agent_obs_size
        max_action = env.max_action
    return agent_obs_size, max_action


def quat2expmap(q):
    """
    Converts a quaternion to an exponential map
    Matlab port to python for evaluation purposes
    https://github.com/asheshjain399/RNNexp/blob/srnn/structural_rnn/CRFProblems/H3.6m/mhmublv/Motion/quat2expmap.m#L1
    Args
    q: 1x4 quaternion
    Returns
    r: 1x3 exponential map
    Raises
    ValueError if the l2 norm of the quaternion is not close to 1
    """
    if np.abs(np.linalg.norm(q) - 1) > 1e-3:
        raise (ValueError, "quat2expmap: input quaternion is not norm 1")

    sinhalftheta = np.linalg.norm(q[1:])
    coshalftheta = q[0]
    r0 = np.divide(q[1:], (np.linalg.norm(q[1:]) + np.finfo(np.float32).eps))
    theta = 2 * np.arctan2(sinhalftheta, coshalftheta)
    theta = np.mod(theta + 2 * np.pi, 2 * np.pi)
    if theta > np.pi:
        theta = 2 * np.pi - theta
        r0 = -r0
    r = r0 * theta
    return r


# replay buffer: expects tuples of (state, next_state, action, reward, done)
# modified from https://github.com/openai/baselines/blob/master/baselines/deepq/replay_buffer.py
class ReplayBuffer(object):
    def __init__(self, max_size=1e6, slicing_size=None):
        self.storage = []
        self.max_size = max_size
        self.ptr = 0
        # maintains slicing info for [obs, new_obs, action, reward, done]
        if slicing_size:
            self.slicing_size = slicing_size
        else:
            self.slicing_size = None

    def clear(self):
        self.storage = []
        self.ptr = 0

    def add(self, data):
        if self.slicing_size is None:
            self.slicing_size = [data[0].size, data[1].size, data[2].size, 1, 1]
        data = np.concatenate([data[0], data[1], data[2], [data[3]], [data[4]]])
        if len(self.storage) == self.max_size:
            self.storage[int(self.ptr)] = data
            self.ptr = (self.ptr + 1) % self.max_size
        else:
            self.storage.append(data)

    def sample(self, batch_size):
        ind = np.random.randint(0, len(self.storage), size=batch_size)
        x, y, u, r, d = [], [], [], [], []

        for i in ind:
            data = self.storage[i]
            X = data[: self.slicing_size[0]]
            Y = data[self.slicing_size[0] : self.slicing_size[0] + self.slicing_size[1]]
            U = data[
                self.slicing_size[0]
                + self.slicing_size[1] : self.slicing_size[0]
                + self.slicing_size[1]
                + self.slicing_size[2]
            ]
            R = data[
                self.slicing_size[0]
                + self.slicing_size[1]
                + self.slicing_size[2] : self.slicing_size[0]
                + self.slicing_size[1]
                + self.slicing_size[2]
                + self.slicing_size[3]
            ]
            D = data[
                self.slicing_size[0]
                + self.slicing_size[1]
                + self.slicing_size[2]
                + self.slicing_size[3] :
            ]
            x.append(np.array(X, copy=False))
            y.append(np.array(Y, copy=False))
            u.append(np.array(U, copy=False))
            r.append(np.array(R, copy=False))
            d.append(np.array(D, copy=False))

        return (
            np.array(x),
            np.array(y),
            np.array(u),
            np.array(r).reshape(-1, 1),
            np.array(d).reshape(-1, 1),
        )


class MLPBase(nn.Module):
    def __init__(self, num_inputs, num_outputs):
        super(MLPBase, self).__init__()
        self.l1 = nn.Linear(num_inputs, 400)
        self.l2 = nn.Linear(400, 300)
        self.l3 = nn.Linear(300, num_outputs)

    def forward(self, inputs):
        x = F.relu(self.l1(inputs))
        x = F.relu(self.l2(x))
        x = self.l3(x)
        return x


def getGraphStructure(xml_file, graph_type="morphology"):
    """Traverse the given xml file as a tree by pre-order and return the graph structure as a parents list"""

    def preorder(b, parent_idx=-1):
        self_idx = len(parents)
        # parents.append(parent_idx)
        assert 'joint' in b, "getGraphStructure error!"
        if not isinstance(b["joint"], list):
            parents.append([parent_idx])
        else:
            parents.append([parent_idx] * len(b["joint"]))

        if "body" not in b:
            return
        if not isinstance(b["body"], list):
            b["body"] = [b["body"]]
        for branch in b["body"]:
            preorder(branch, self_idx)

    with open(xml_file) as fd:
        xml = xmltodict.parse(fd.read())
    parents = []
    try:
        root = xml["mujoco"]["worldbody"]["body"]
        assert not isinstance(
            root, list
        ), "worldbody can only contain one body (torso) for the current implementation, but found {}".format(
            root
        )
    except:
        raise Exception(
            "The given xml file does not follow the standard MuJoCo format."
        )
    preorder(root)
    # signal message flipping for flipped walker morphologies
    if "walker" in os.path.basename(xml_file) and "flipped" in os.path.basename(
        xml_file
    ):
        parents[0] = -2

    if graph_type == "tree":
        parents[1:] = [0] * len(parents[1:])
    elif graph_type == "line":
        for i in range(1, len(parents)):
            parents[i] = i - 1
    else:
        parents[0] = [-1]

    return parents


def getGraphJoints(xml_file):
    """Traverse the given xml file as a tree by pre-order and return all the joints defined as a list of tuples (body_name, joint_name1, ...) for each body"""
    """Used to match the order of joints defined in worldbody and joints defined in actuators"""

    def preorder(b):
        if "joint" in b:
            if isinstance(b["joint"], list) and not "torso" in b["@name"]:
                raise Exception(
                    "The given xml file does not follow the standard MuJoCo format."
                )
            elif not isinstance(b["joint"], list):
                b["joint"] = [b["joint"]]
            joints.append([b["@name"]])
            for j in b["joint"]:
                joints[-1].append(j["@name"])
        if "body" not in b:
            return
        if not isinstance(b["body"], list):
            b["body"] = [b["body"]]
        for branch in b["body"]:
            preorder(branch)

    with open(xml_file) as fd:
        xml = xmltodict.parse(fd.read())
    joints = []
    try:
        root = xml["mujoco"]["worldbody"]["body"]
    except:
        raise Exception(
            "The given xml file does not follow the standard MuJoCo format."
        )
    preorder(root)
    return joints


def getMotorJoints(xml_file):
    """Traverse the given xml file as a tree by pre-order and return the joint names in the order of defined actuators"""
    """Used to match the order of joints defined in worldbody and joints defined in actuators"""
    with open(xml_file) as fd:
        xml = xmltodict.parse(fd.read())
    joints = []
    motors = xml["mujoco"]["actuator"]["motor"]
    if not isinstance(motors, list):
        motors = [motors]
    for m in motors:
        joints.append(m["@joint"])
    return joints


def floyd(g):
    n = len(g)  # [n,n]
    g = g.copy()
    for k in range(n):
        for i in range(n):
            for j in range(n):
                g[i, j] = min(g[i, j], g[i, k] + g[k, j])
    return g

# Tree
class Node:
    def __init__(self, ID, P, L=None, R=None):
        self.ID = ID
        self.P = P
        self.L = L
        self.R = R

class BiTree:
    def __init__(self, P_list):
        self.root = Node(0,None)
        self.tree = {
            0: self.root,
        }
        for i in range(1,len(P_list),1):
            ID,P_ID = P_list[i]
            P = self.tree[P_ID]
            if P.L is None:
                node = Node(ID, P)
                self.tree.update({ID: node})
                P.L = node
            else:
                P = P.L
                while True:
                    if P.R is None:
                        node = Node(ID, P)
                        self.tree.update({ID: node})
                        P.R = node
                        break
                    else:
                        P = P.R

    def x_order(self, x='pre'):
        def _x_order(cur_root=None):
            if cur_root is None:
                return []
            elif x == 'pre':
                return [cur_root.ID, *_x_order(cur_root.L), *_x_order(cur_root.R)]
            elif x == 'in':
                return [*_x_order(cur_root.L), cur_root.ID, *_x_order(cur_root.R)]
            elif x == 'post':
                return [*_x_order(cur_root.L),*_x_order(cur_root.R), cur_root.ID]
            else:
                raise NotImplementedError
        return _x_order(self.root)

    def get_embeds(self):
        pre_order_list = self.x_order('pre')
        in_order_list = self.x_order('in')
        post_order_list = self.x_order('post')
        embeds = []
        for i in range(len(pre_order_list)):
            embeds.append([
                pre_order_list.index(i), in_order_list.index(i), post_order_list.index(i)
            ])
        return embeds


def getStructureInfo(graphs):
    distance = {}
    embedding = {}

    graphs_merge = {}
    for k, v in graphs.items():
        graphs_merge[k] = [i[0] for i in v]

    for name, parents in graphs_merge.items():
        N_joint = sum([len(x) for x in graphs[name]])
        N_limb = len(parents)

        T = {}
        count = 0
        for i in range(N_limb):
            for _ in range(len(graphs[name][i])):
                T[count] = i
                count += 1

        # distance
        G = np.full((N_limb, N_limb), np.inf)
        for i in range(N_limb):
            G[i,i] = 0
        for idx in range(N_limb):
            p_idx = parents[idx]
            if p_idx != -1:
                G[idx, p_idx] = 1
                G[p_idx, idx] = 1

        dist = floyd(G)

        dist_ori = np.full((N_joint, N_joint), np.inf)
        for i in range(N_joint):
            for j in range(N_joint):
                dist_ori[i,j] = dist[T[i], T[j]]

        distance[name] = dist_ori

        # embeds
        ID_PID = [
            [i, parents[i]] for i in range(N_limb)
        ]
        embeds = BiTree(ID_PID).get_embeds()
        embeds_ori = []
        for i in range(N_limb):
            if len(graphs[name][i]) == 1:
                embeds_ori.append([*embeds[i], 0])
            elif len(graphs[name][i]) == 2:
                embeds_ori.append([*embeds[i], 1])
                embeds_ori.append([*embeds[i], 2])
            else:
                raise NotImplementedError

        embedding[name] = embeds_ori
    return distance, embedding

# 'walker_2_main', ('torso', 'left1')
# 'walker_3_main', ('torso', 'left1', 'right1')
# 'walker_4_main', ('torso', 'left1', 'left2', 'right1')
# 'walker_5_main', ('torso', 'left1', 'left2', 'right1', 'right2')
# 'walker_6_main', ('torso', 'left1', 'left2', 'left3', 'right1', 'right2')
# 'walker_7_main' ('torso', 'left1', 'left2', 'left3', 'right1', 'right2', 'right3')

# 'humanoid_2d_7_left_arm', ('torso', 'right_thigh', 'right_shin', 'left_thigh', 'left_shin', 'right_upper_arm', 'right_lower_arm')
# 'humanoid_2d_7_left_leg', ('torso', 'right_thigh', 'right_shin', 'right_upper_arm', 'right_lower_arm', 'left_upper_arm', 'left_lower_arm')
# 'humanoid_2d_7_lower_arms', ('torso', 'right_thigh', 'right_shin', 'left_thigh', 'left_shin', 'right_upper_arm', 'left_upper_arm')
# 'humanoid_2d_7_right_arm', ('torso', 'right_thigh', 'right_shin', 'left_thigh', 'left_shin', 'left_upper_arm', 'left_lower_arm')
# 'humanoid_2d_7_right_leg', ('torso', 'left_thigh', 'left_shin', 'right_upper_arm', 'right_lower_arm', 'left_upper_arm', 'left_lower_arm')
# 'humanoid_2d_8_left_knee', ('torso', 'right_thigh', 'right_shin', 'left_thigh', 'right_upper_arm', 'right_lower_arm', 'left_upper_arm', 'left_lower_arm')
# 'humanoid_2d_8_right_knee', ('torso', 'right_thigh', 'left_thigh', 'left_shin', 'right_upper_arm', 'right_lower_arm', 'left_upper_arm', 'left_lower_arm')
# 'humanoid_2d_9_full',  ('torso', 'right_thigh', 'right_shin', 'left_thigh', 'left_shin', 'right_upper_arm', 'right_lower_arm', 'left_upper_arm', 'left_lower_arm')


# morphology = {
#     'walker_2_main': {
#         'N': 2,
#         'edge': [
#             [0, 1]
#         ]
#     },
#     'walker_3_main': {
#         'N': 3,
#         'edge': [
#             [0, 1],
#             [0, 2]
#         ]
#     },
#     'walker_4_main': {
#         'N': 4,
#         'edge': [
#             [0, 1],
#             [1, 2],
#             [0, 3]
#         ]
#     },
#     'walker_5_main': {
#         'N': 5,
#         'edge': [
#             [0, 1],
#             [1, 2],
#             [0, 3],
#             [3, 4]
#         ]
#     },
#     'walker_6_main': {
#         'N': 6,
#         'edge': [
#             [0, 1],
#             [1, 2],
#             [2, 3],
#             [0, 4],
#             [4, 5],
#         ]
#     },
#     'walker_7_main': {
#         'N': 7,
#         'edge': [
#             [0, 1],
#             [1, 2],
#             [2, 3],
#             [0, 4],
#             [4, 5],
#             [5, 6],
#         ]
#     },
#
#     'humanoid_2d_7_left_arm': {
#         'N': 7,
#         'edge': [
#             [0, 1],
#             [1, 2],
#             [0, 3],
#             [3, 4],
#             [0, 5],
#             [5, 6],
#         ]
#     },
#     'humanoid_2d_7_left_leg': {
#         'N': 7,
#         'edge': [
#             [0, 1],
#             [1, 2],
#             [0, 3],
#             [3, 4],
#             [0, 5],
#             [5, 6],
#         ]
#     },
#     'humanoid_2d_7_lower_arms': {
#         'N': 7,
#         'edge': [
#             [0, 1],
#             [1, 2],
#             [0, 3],
#             [3, 4],
#             [0, 5],
#             [0, 6],
#         ]
#     },
#     'humanoid_2d_7_right_arm': {
#         'N': 7,
#         'edge': [
#             [0, 1],
#             [1, 2],
#             [0, 3],
#             [3, 4],
#             [0, 5],
#             [5, 6],
#         ]
#     },
#     'humanoid_2d_7_right_leg': {
#         'N': 7,
#         'edge': [
#             [0, 1],
#             [1, 2],
#             [0, 3],
#             [3, 4],
#             [0, 5],
#             [5, 6],
#         ]
#     },
#     'humanoid_2d_8_left_knee': {
#         'N': 8,
#         'edge': [
#             [0, 1],
#             [1, 2],
#             [0, 3],
#             [0, 4],
#             [4, 5],
#             [0, 6],
#             [6, 7],
#         ]
#     },
#     'humanoid_2d_8_right_knee': {
#         'N': 8,
#         'edge': [
#             [0, 1],
#             [0, 2],
#             [2, 3],
#             [0, 4],
#             [4, 5],
#             [0, 6],
#             [6, 7],
#         ]
#     },
#     'humanoid_2d_9_full': {
#         'N': 9,
#         'edge': [
#             [0, 1],
#             [1, 2],
#             [0, 3],
#             [3, 4],
#             [0, 5],
#             [5, 6],
#             [0, 7],
#             [7, 8]
#         ]
#     },
# }
#
# # [pre-order, in-order, post-order]
# # robot_joint_embeds = {
# #     'walker_2_main':
# #         torch.tensor([[[0, 0, 0], [1, 0, 0]]],
# #                      dtype=torch.float, device=device, requires_grad=False),
# #     'walker_3_main':
# #         torch.tensor([[[0, 0, 0], [1, 0, 0], [2, 0, 0]]],
# #                      dtype=torch.float, device=device, requires_grad=False),
# #     'walker_4_main':
# #         torch.tensor([[[0, 0, 0], [1, 0, 0], [1, 1, 0], [2, 0, 0]]],
# #                      dtype=torch.float, device=device, requires_grad=False),
# #     'walker_5_main':
# #         torch.tensor([[[0, 0, 0], [1, 0, 0], [1, 1, 0], [2, 0, 0], [2, 1, 0]]],
# #                      dtype=torch.float, device=device, requires_grad=False),
# #     'walker_6_main':
# #         torch.tensor([[[0, 0, 0], [1, 0, 0], [1, 1, 0], [1, 1, 1], [2, 0, 0], [2, 1, 0]]],
# #                      dtype=torch.float, device=device, requires_grad=False),
# #     'walker_7_main':
# #         torch.tensor([[[0, 0, 0], [1, 0, 0], [1, 1, 0], [1, 1, 1], [2, 0, 0], [2, 1, 0], [2, 1, 1]]],
# #                      dtype=torch.float, device=device, requires_grad=False),
# #
# #     'humanoid_2d_7_left_arm':
# #         torch.tensor([[[0, 0, 0], [1, 0, 0], [1, 1, 0], [2, 0, 0], [2, 1, 0], [3, 0, 0], [3, 1, 0]]],
# #                      dtype=torch.float, device=device, requires_grad=False),
# #     'humanoid_2d_7_left_leg':
# #         torch.tensor([[[0, 0, 0], [1, 0, 0], [1, 1, 0], [3, 0, 0], [3, 1, 0], [4, 0, 0], [4, 1, 0]]],
# #                      dtype=torch.float, device=device, requires_grad=False),
# #     'humanoid_2d_7_lower_arms':
# #         torch.tensor([[[0, 0, 0], [1, 0, 0], [1, 1, 0], [2, 0, 0], [2, 1, 0], [3, 0, 0], [4, 0, 0]]],
# #                      dtype=torch.float, device=device, requires_grad=False),
# #     'humanoid_2d_7_right_arm':
# #         torch.tensor([[[0, 0, 0], [1, 0, 0], [1, 1, 0], [2, 0, 0], [2, 1, 0], [4, 0, 0], [4, 1, 0]]],
# #                      dtype=torch.float, device=device, requires_grad=False),
# #     'humanoid_2d_7_right_leg':
# #         torch.tensor([[[0, 0, 0], [2, 0, 0], [2, 1, 0], [3, 0, 0], [3, 1, 0], [4, 0, 0], [4, 1, 0]]],
# #                      dtype=torch.float, device=device, requires_grad=False),
# #     'humanoid_2d_8_left_knee':
# #         torch.tensor([[[0, 0, 0], [1, 0, 0], [1, 1, 0], [2, 0, 0], [3, 0, 0], [3, 1, 0], [4, 0, 0], [4, 1, 0]]],
# #                      dtype=torch.float, device=device, requires_grad=False),
# #     'humanoid_2d_8_right_knee':
# #         torch.tensor([[[0, 0, 0], [1, 0, 0], [2, 0, 0], [2, 1, 0], [3, 0, 0], [3, 1, 0], [4, 0, 0], [4, 1, 0]]],
# #                      dtype=torch.float, device=device, requires_grad=False),
# #     'humanoid_2d_9_full':
# #         torch.tensor([[[0, 0, 0], [1, 0, 0], [1, 1, 0], [2, 0, 0], [2, 1, 0], [3, 0, 0], [3, 1, 0], [4, 0, 0],
# #                        [4, 1, 0]]],
# #                      dtype=torch.float, device=device, requires_grad=False),
# # }
# robot_joint_embeds2 = {
#     'walker_2_main':
#         torch.tensor([[[0, 1, 1], [1, 0, 0]]],
#                      dtype=torch.float, device=device, requires_grad=False),
#     'walker_3_main':
#         torch.tensor([[[0, 2, 2], [1, 0, 1], [2, 1, 0]]],
#                      dtype=torch.float, device=device, requires_grad=False),
#     'walker_4_main':
#         torch.tensor([[[0, 3, 3], [1, 1, 2], [2, 0, 0], [3, 2, 1]]],
#                      dtype=torch.float, device=device, requires_grad=False),
#     'walker_5_main':
#         torch.tensor([[[0, 4, 4], [1, 1, 3], [2, 0, 0], [3, 3, 2], [4, 2, 1]]],
#                      dtype=torch.float, device=device, requires_grad=False),
#     'walker_6_main':
#         torch.tensor([[[0, 5, 5], [1, 2, 4], [2, 1, 1], [3, 0, 0], [4, 4, 3], [5, 3, 2]]],
#                      dtype=torch.float, device=device, requires_grad=False),
#
#     'walker_7_main':
#         torch.tensor([[[0, 6, 6], [1, 2, 5], [2, 1, 1], [3, 0, 0], [4, 5, 4], [5, 4, 3], [6, 3, 2]]],
#                      dtype=torch.float, device=device, requires_grad=False),
#
#     'humanoid_2d_7_left_arm':
#         torch.tensor([[[0, 6, 6], [3, 3, 4], [4, 2, 1], [1, 1, 5], [2, 0, 0], [5, 5, 3], [6, 4, 2]]],
#                      dtype=torch.float, device=device, requires_grad=False),
#     'humanoid_2d_7_left_leg':
#         torch.tensor([[[0, 6, 6], [3, 3, 4], [4, 2, 1], [5, 5, 3], [6, 4, 2], [1, 1, 5], [2, 0, 0]]],
#                      dtype=torch.float, device=device, requires_grad=False),
#     'humanoid_2d_7_lower_arms':
#         torch.tensor([[[0, 6, 6], [4, 4, 3], [5, 3, 1], [2, 2, 4], [3, 1, 0], [6, 5, 2], [1, 0, 5]]],
#                      dtype=torch.float, device=device, requires_grad=False),
#     'humanoid_2d_7_right_arm':
#         torch.tensor([[[0, 6, 6], [5, 5, 3], [6, 4, 2], [3, 3, 4], [4, 2, 1], [1, 1, 5], [2, 0, 0]]],
#                      dtype=torch.float, device=device, requires_grad=False),
#     'humanoid_2d_7_right_leg':
#         torch.tensor([[[0, 6, 6], [3, 3, 4], [4, 2, 1], [5, 5, 3], [6, 4, 2], [1, 1, 5], [2, 0, 0]]],
#                      dtype=torch.float, device=device, requires_grad=False),
#     'humanoid_2d_8_left_knee':
#         torch.tensor([[[0, 7, 7], [4, 4, 4], [5, 3, 1], [3, 2, 5], [6, 6, 3], [7, 5, 2], [1, 1, 6], [2, 0, 0]]],
#                      dtype=torch.float, device=device, requires_grad=False),
#     'humanoid_2d_8_right_knee':
#         torch.tensor([[[0, 7, 7], [5, 4, 4], [3, 3, 5], [4, 2, 1], [6, 6, 3], [7, 5, 2], [1, 1, 6], [2, 0, 0]]],
#                      dtype=torch.float, device=device, requires_grad=False),
#     'humanoid_2d_9_full':
#         torch.tensor([[[0, 8, 8], [5, 5, 5], [6, 4, 2], [3, 3, 6], [4, 2, 1], [7, 7, 4], [8, 6, 3], [1, 1, 7],
#                        [2, 0, 0]]],
#                      dtype=torch.float, device=device, requires_grad=False),
# }

# [ID, P_ID]
# morphology = [
#     ['walker_2_main', [
#         [0,-1],
#         [1,0],
#     ]],
#     ['walker_3_main', [
#         [0,-1],
#         [1,0],
#         [2,0],
#     ]],
#     ['walker_4_main', [
#         [0,-1],
#         [1,0],
#         [2,1],
#         [3,0],
#     ]],
#     ['walker_5_main', [
#         [0,-1],
#         [1,0],
#         [2,1],
#         [3,0],
#         [4,3],
#     ]],
#     ['walker_6_main', [
#         [0,-1],
#         [1,0],
#         [2,1],
#         [3,2],
#         [4,0],
#         [5,4],
#     ]],
#     ['walker_7_main', [
#         [0,-1],
#         [1,0],
#         [2,1],
#         [3,2],
#         [4,0],
#         [5,4],
#         [6,5],
#     ]],
#
#     ['humanoid_2d_7_left_arm', [
#         [0,-1],
#         [3,0],
#         [4,3],
#         [1,0],
#         [2,1],
#         [5,0],
#         [6,5],
#     ]],
#     ['humanoid_2d_7_left_leg', [
#         [0,-1],
#         [5,0],
#         [6,5],
#         [1,0],
#         [2,1],
#         [3,0],
#         [4,3],
#     ]],
#     ['humanoid_2d_7_lower_arms', [
#         [0,-1],
#         [6,0],
#         [3,0],
#         [4,3],
#         [1,0],
#         [2,1],
#         [5,0],
#     ]],
#     ['humanoid_2d_7_right_arm',[
#         [0,-1],
#         [5,0],
#         [6,5],
#         [3,0],
#         [4,3],
#         [1,0],
#         [2,1],
#     ]],
#     ['humanoid_2d_7_right_leg',[
#         [0,-1],
#         [5,0],
#         [6,5],
#         [1,0],
#         [2,1],
#         [3,0],
#         [4,3],
#     ]],
#     ['humanoid_2d_8_left_knee',[
#         [0,-1],
#         [6,0],
#         [7,6],
#         [3,0],
#         [1,0],
#         [2,1],
#         [4,0],
#         [5,4],
#     ]],
#     ['humanoid_2d_8_right_knee',[
#         [0,-1],
#         [6,0],
#         [7,6],
#         [2,0],
#         [3,2],
#         [1,0],
#         [4,0],
#         [5,4],
#     ]],
#     ['humanoid_2d_9_full',[
#         [0,-1],
#         [7,0],
#         [8,7],
#         [3,0],
#         [4,3],
#         [1,0],
#         [2,1],
#         [5,0],
#         [6,5],
#     ]]
# ]
#
# for mo in morphology:
#     name, p_list = mo
#     print(f"""'{name}':
#     torch.tensor([{BiTree(p_list).get_embeds()}],
#     dtype=torch.float,device=device,requires_grad=False),""")
